# Supplementary material for: Association of social vulnerability factors with power outage burden in Washington state: 2018–2021
Source: PubMed Central journal article supplement (PMC11373849; doi:10.1371/journal.pone.0307742), 2024-09-04

# Fig S2, Event 1: 2018

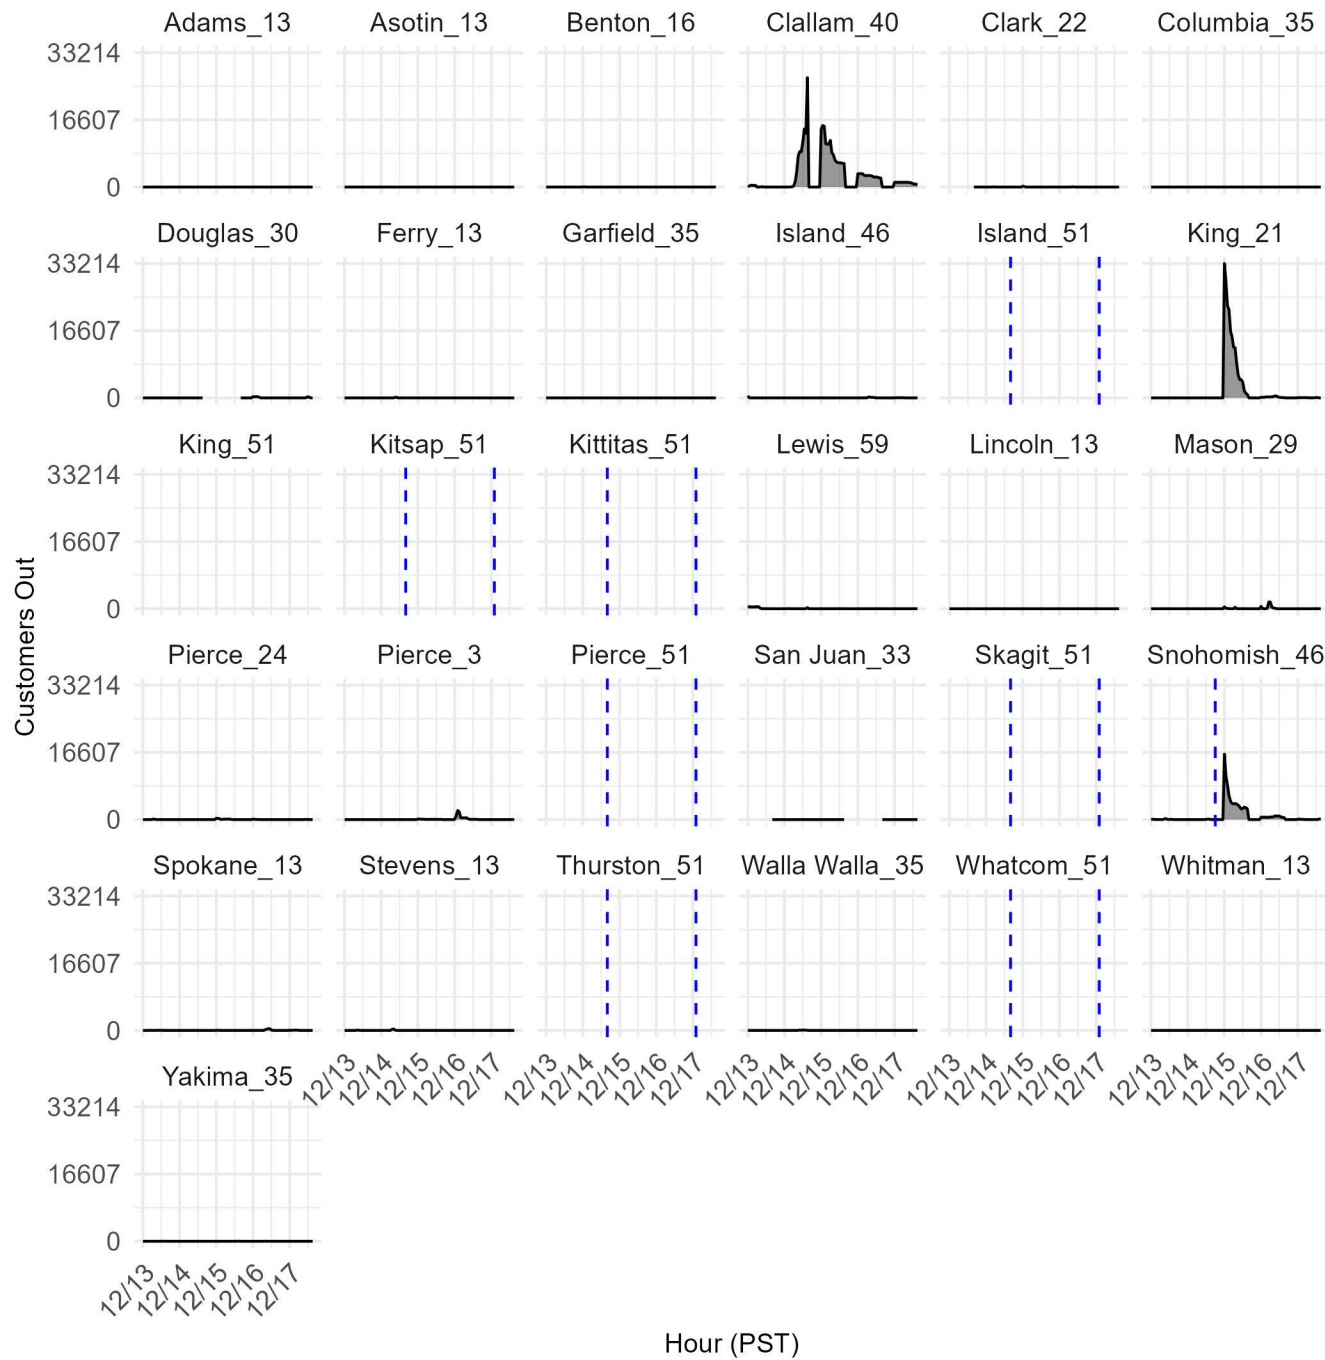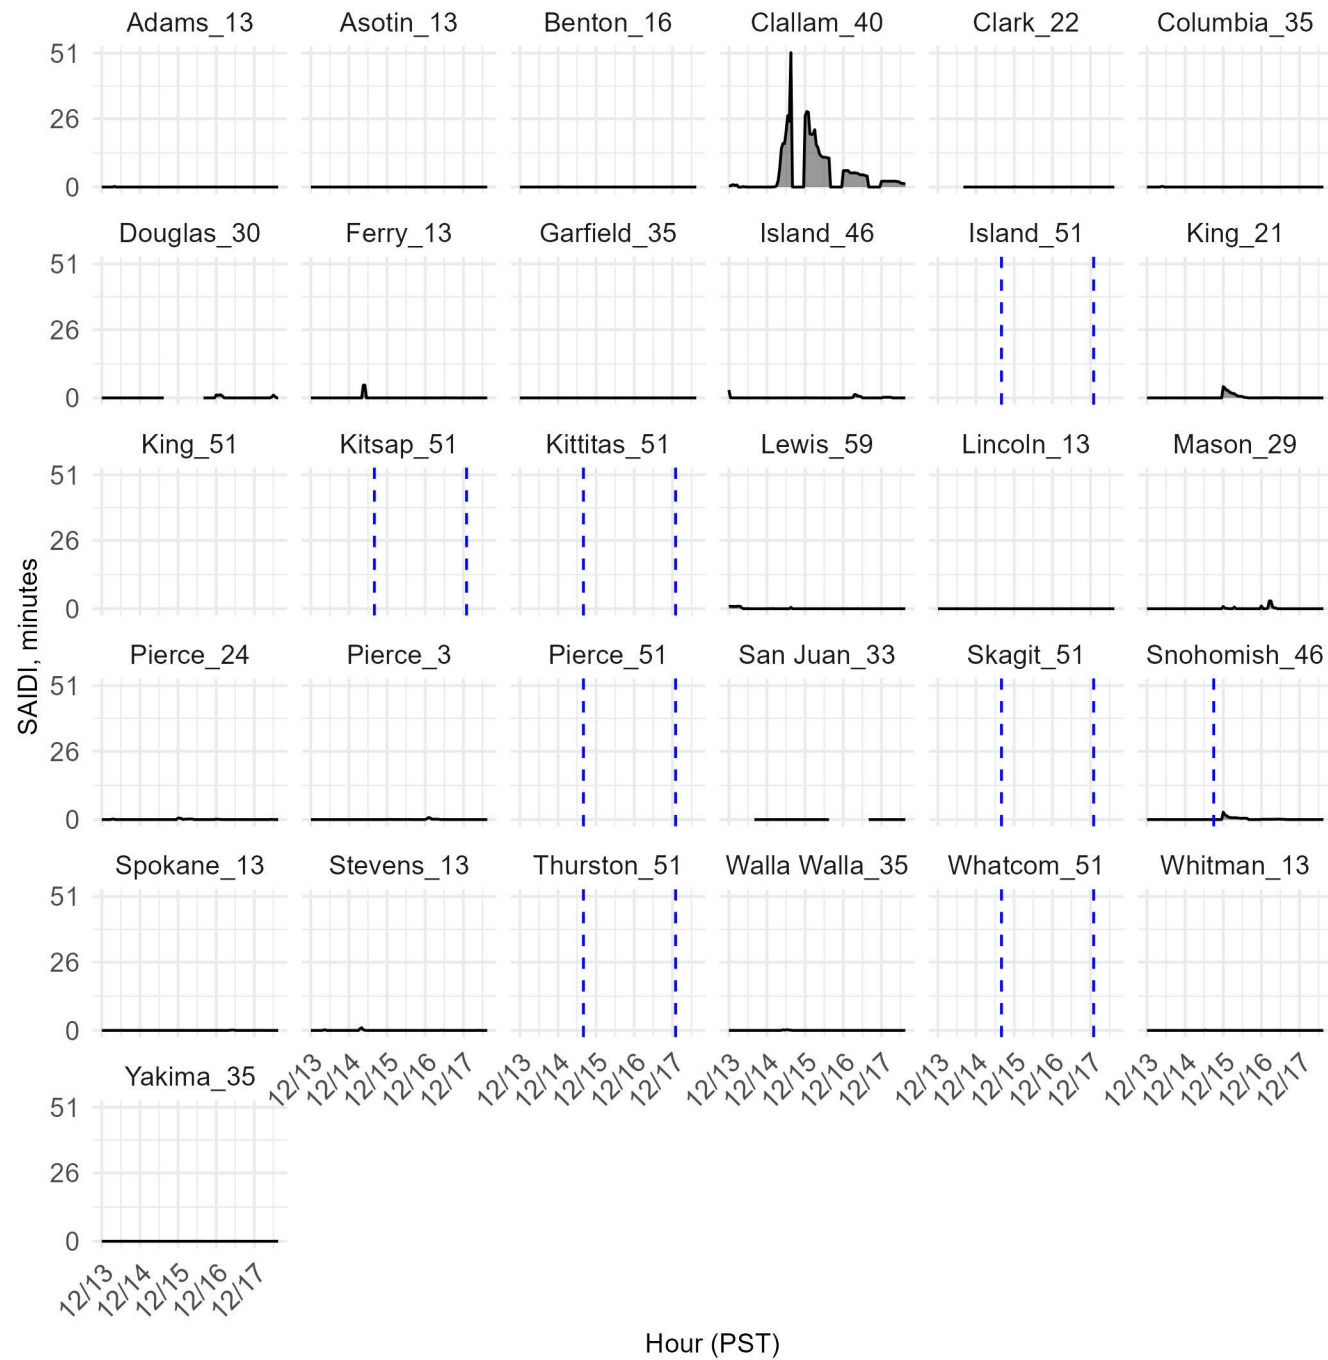

# Fig S2, Event 2: 2018

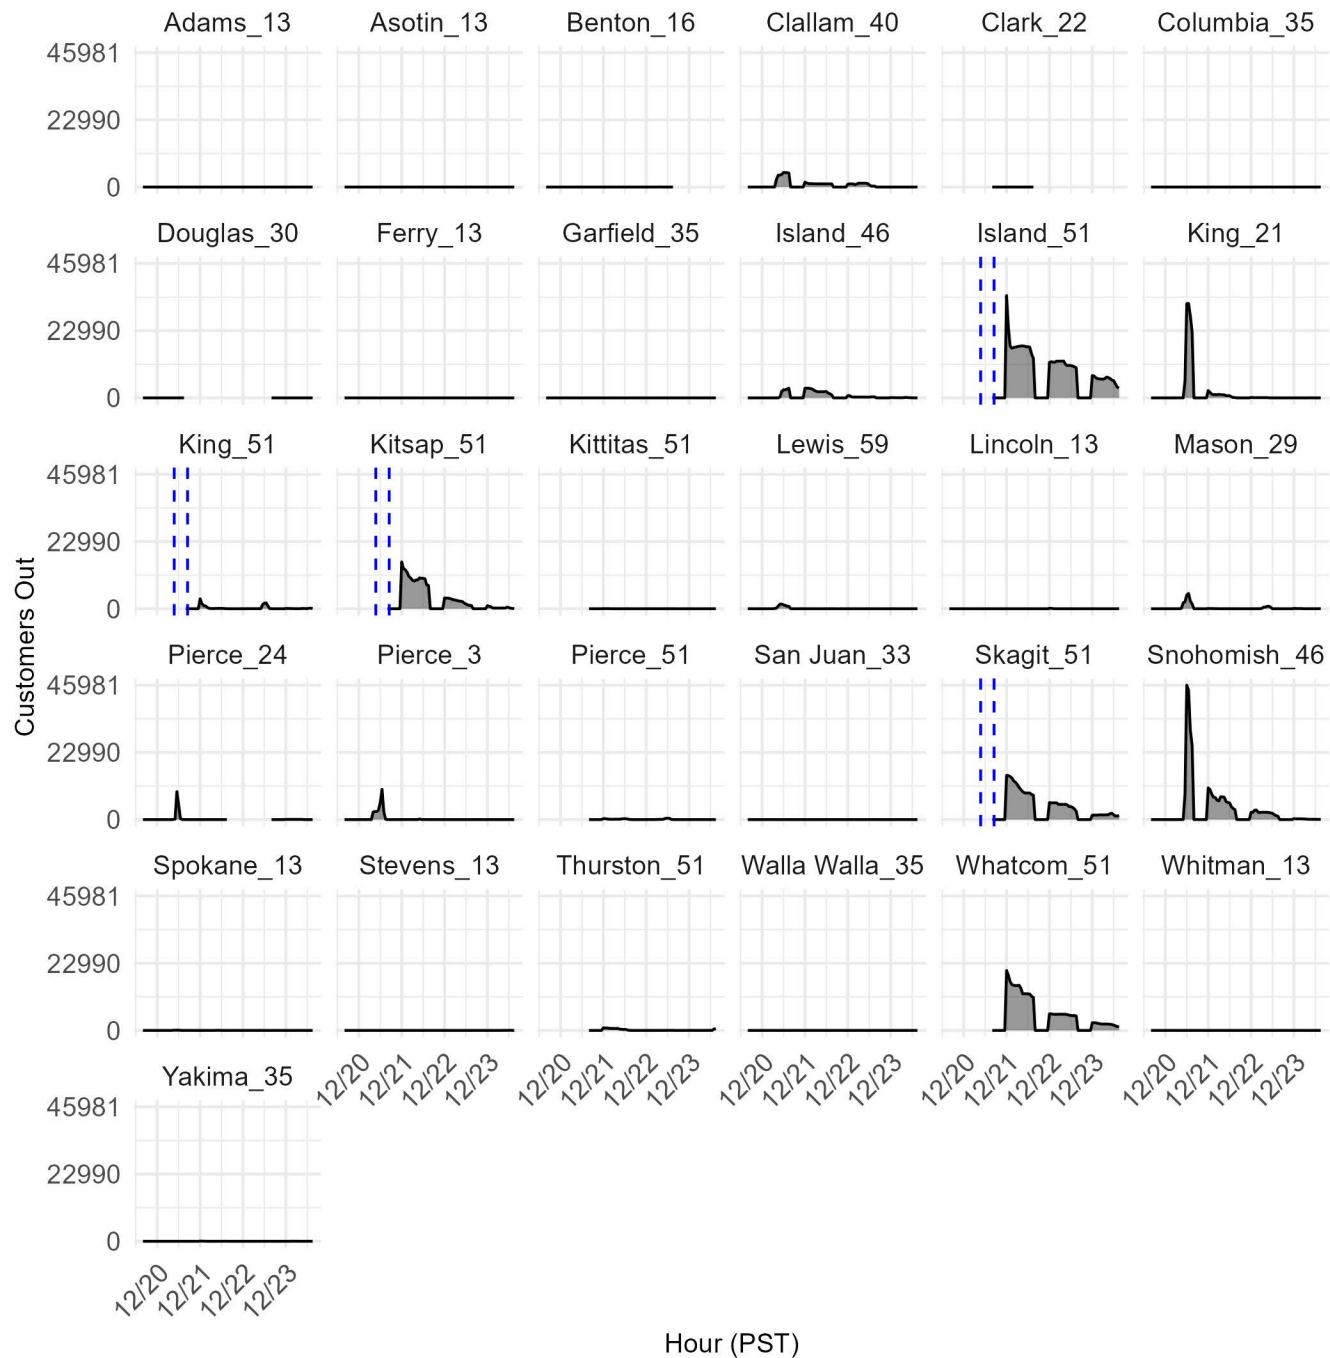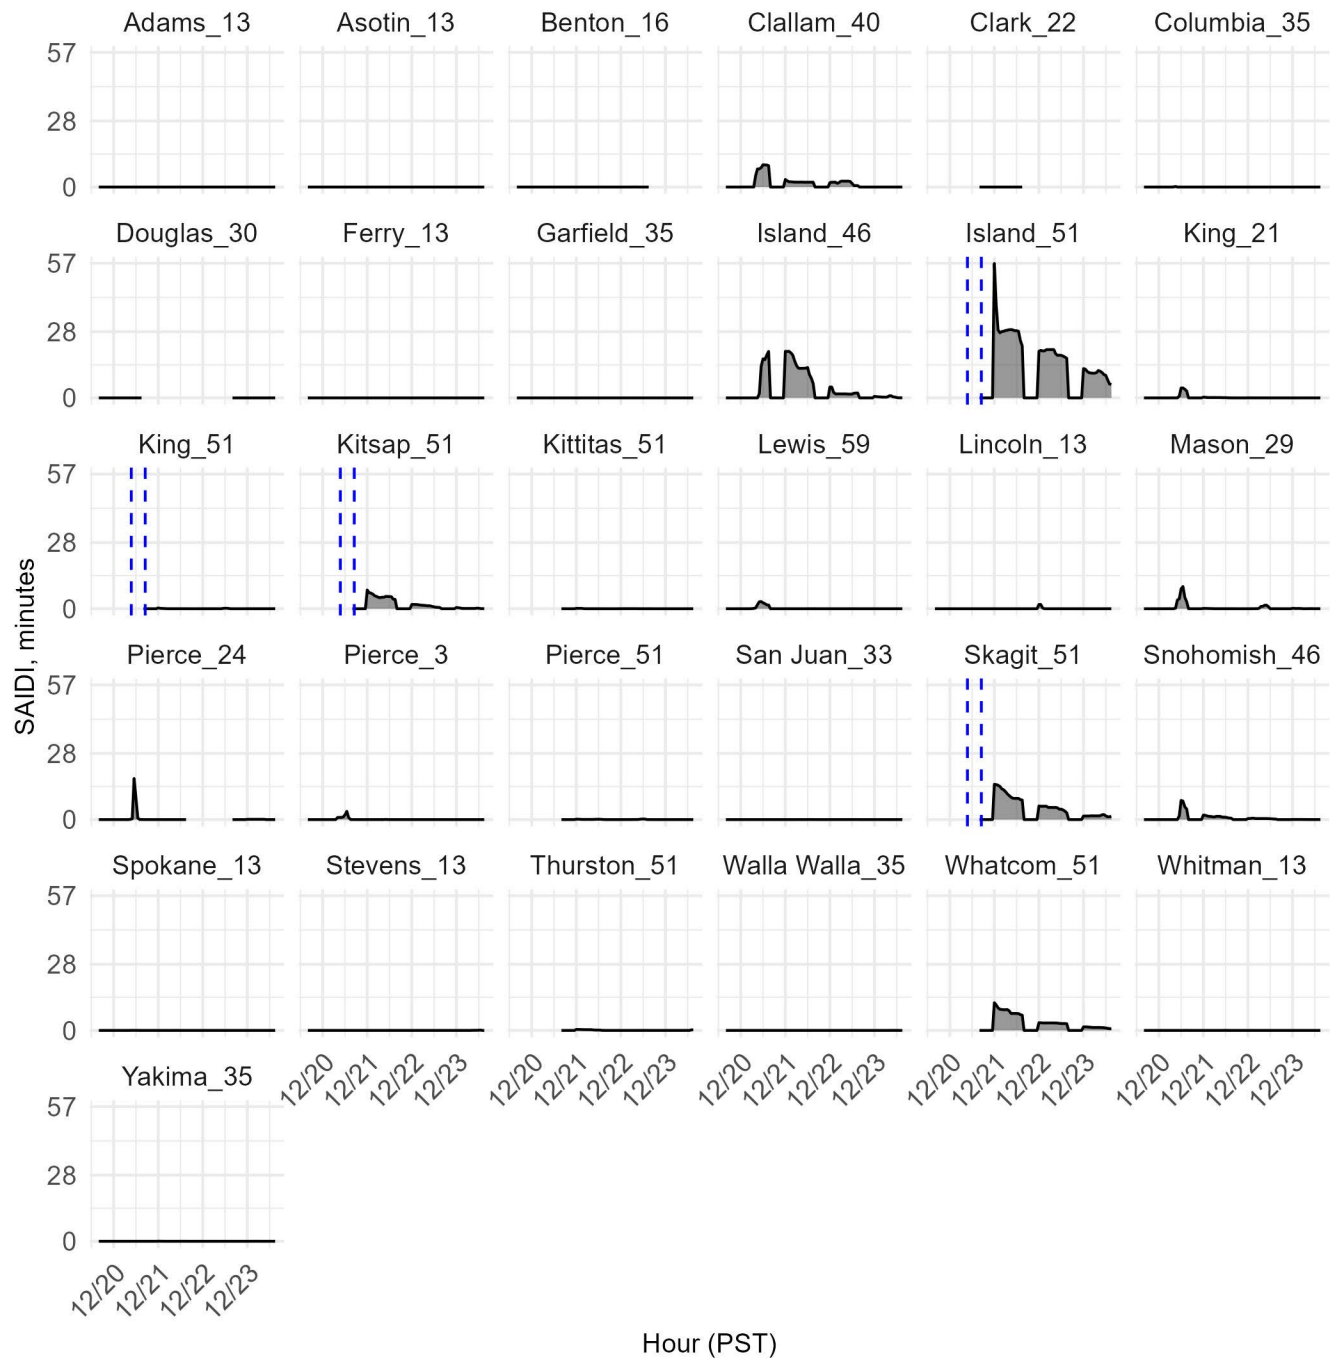

# Fig S2, Event 3: 2019

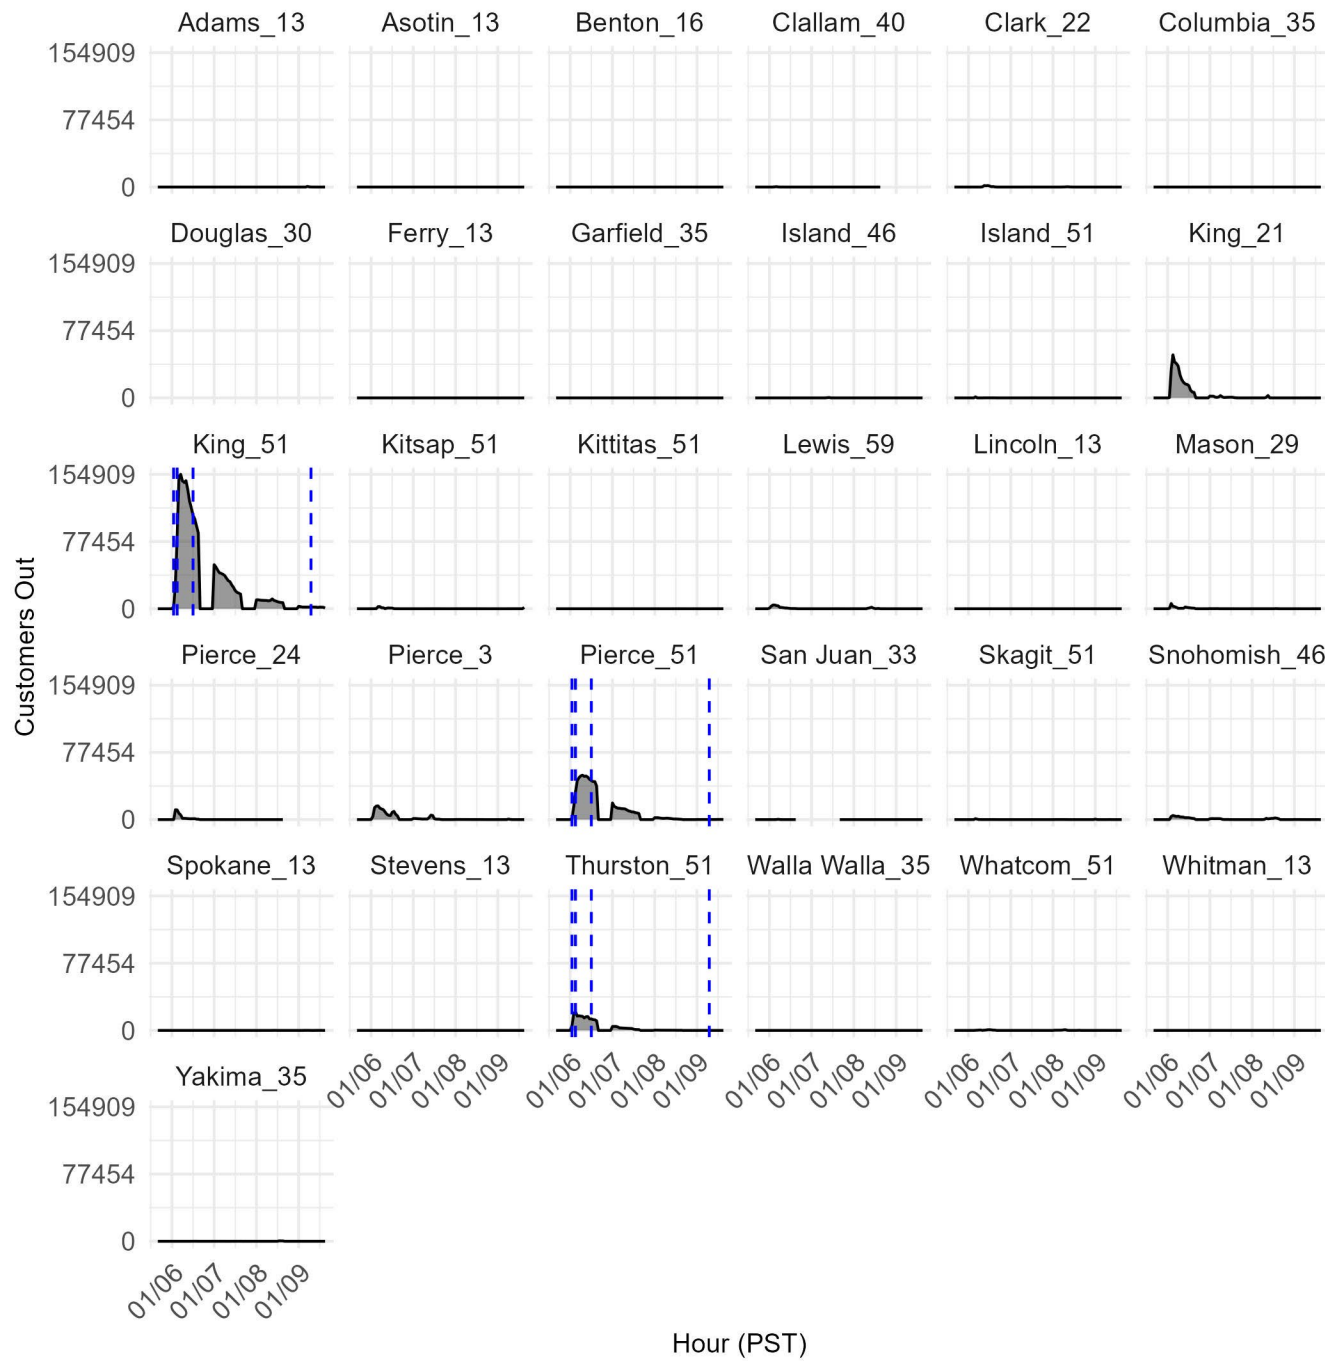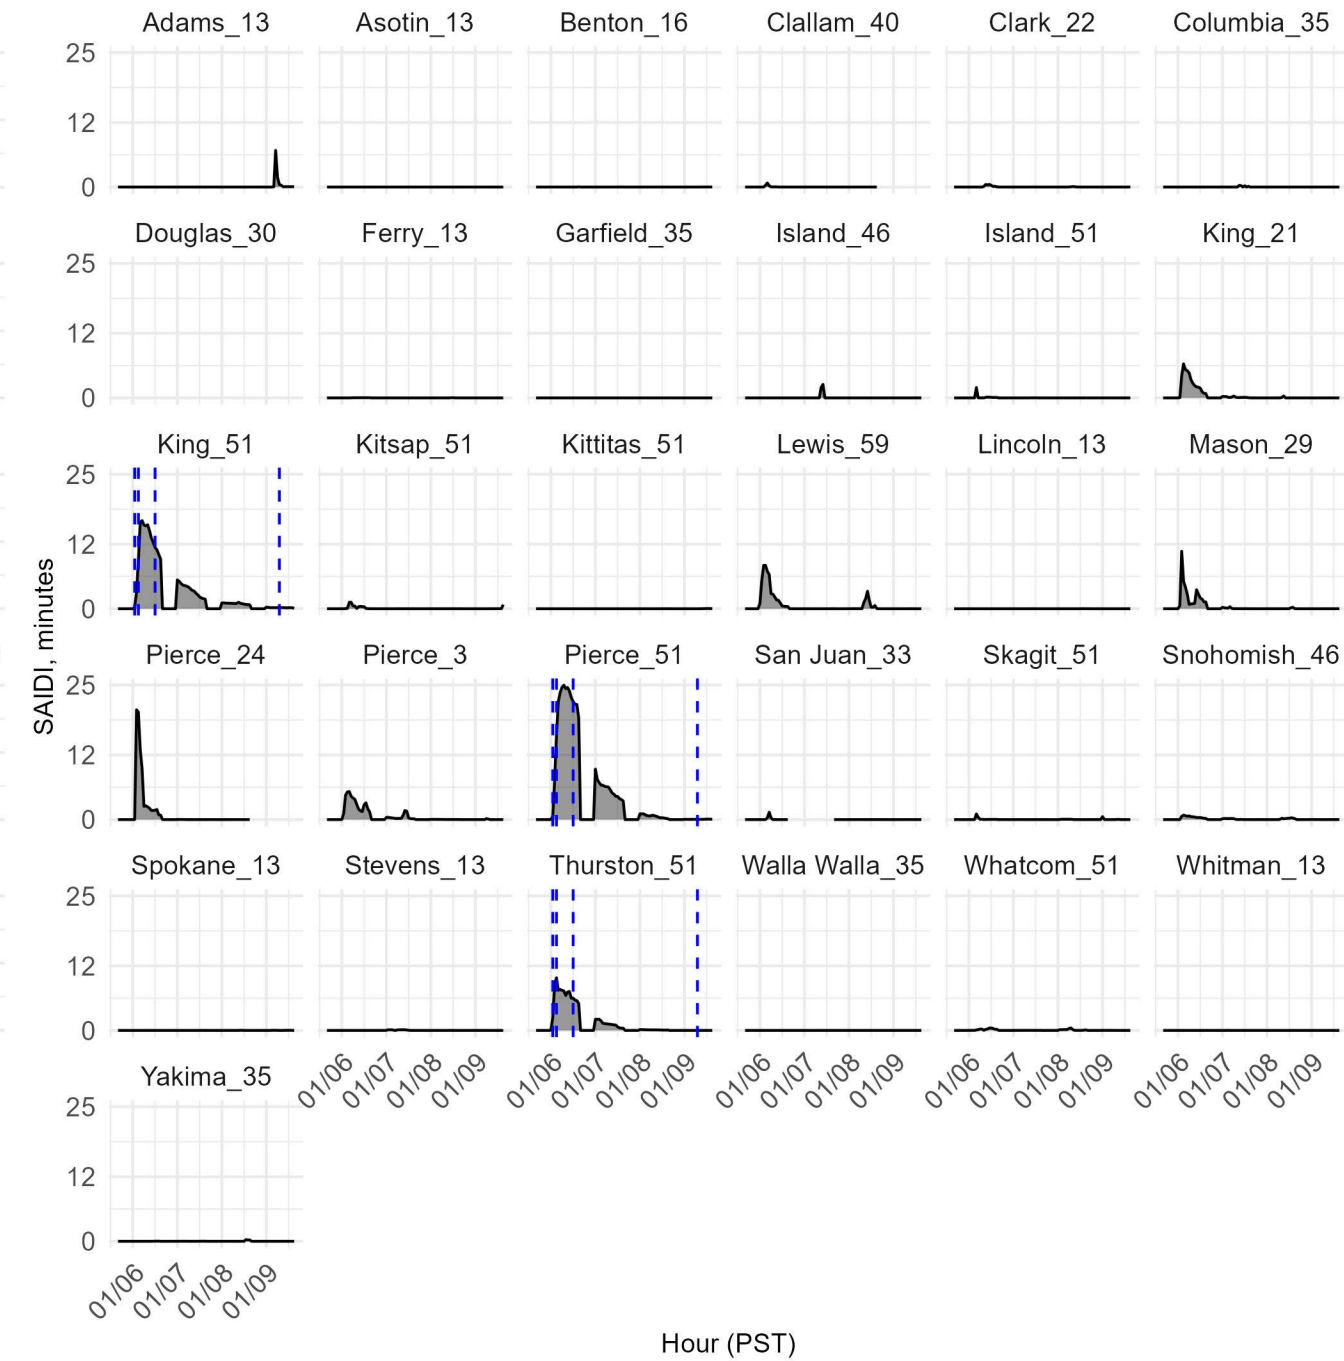

# Fig S2, Event 4: 2019

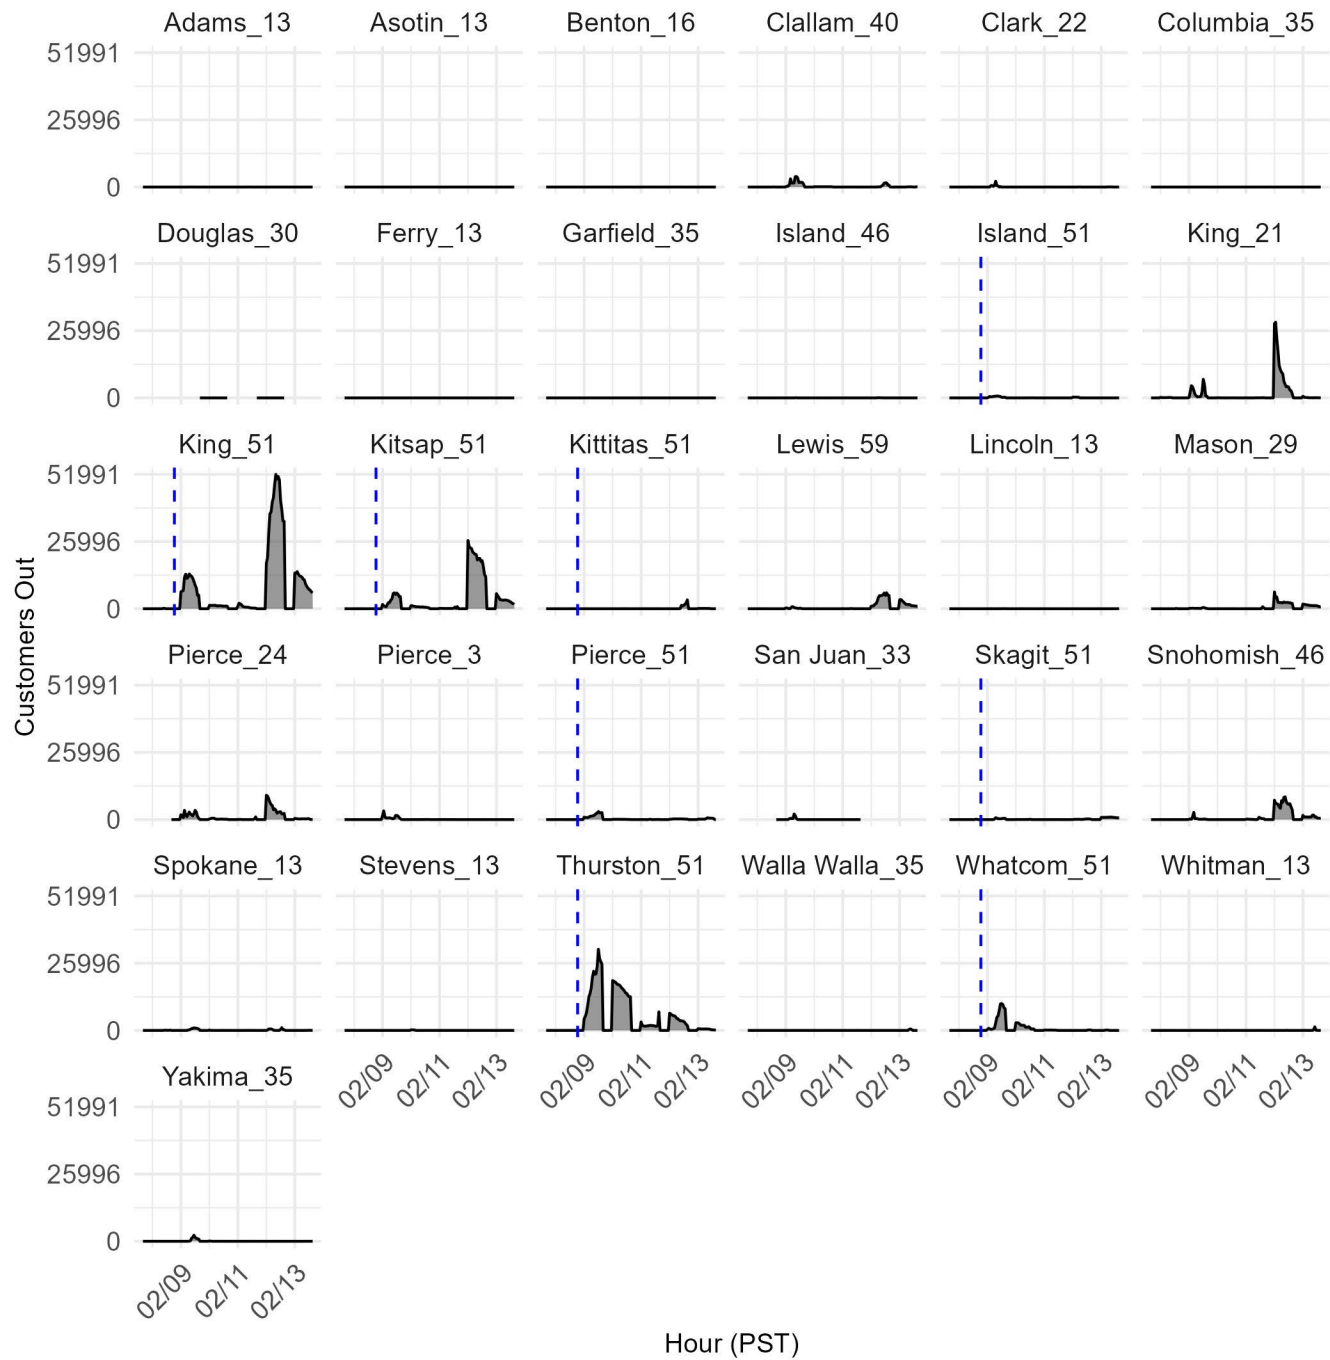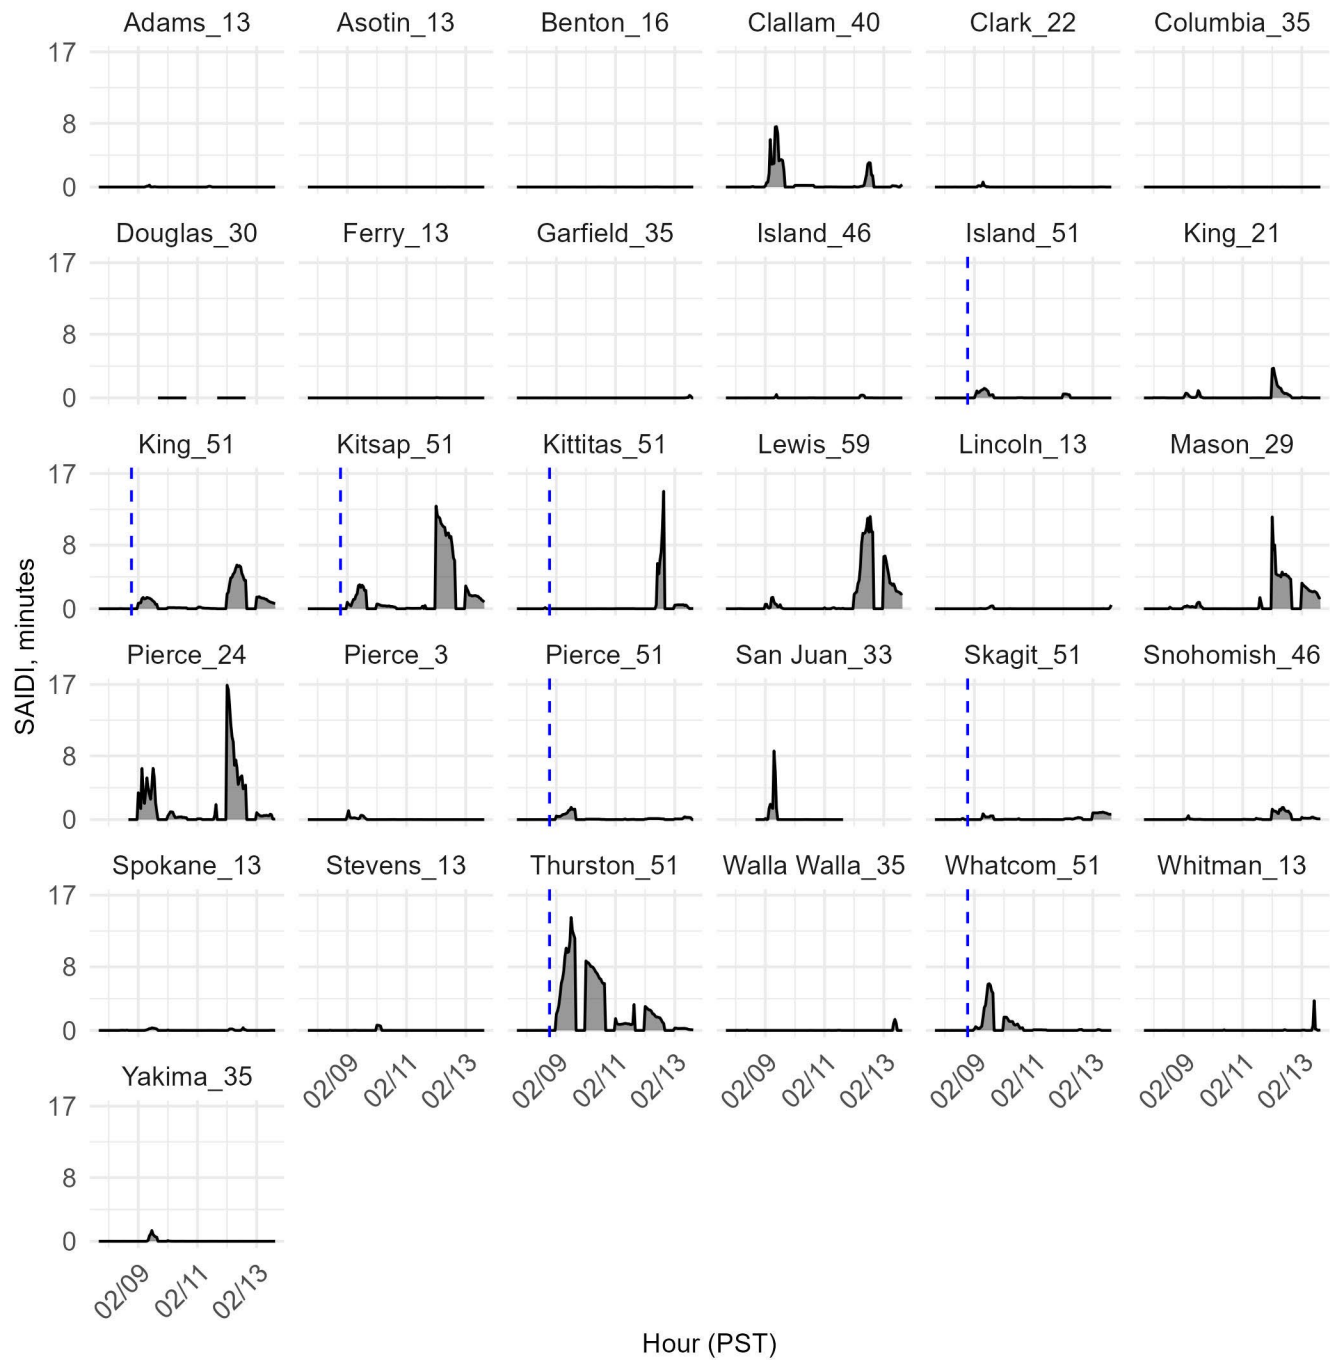

# Fig S2, Event 5: 2020

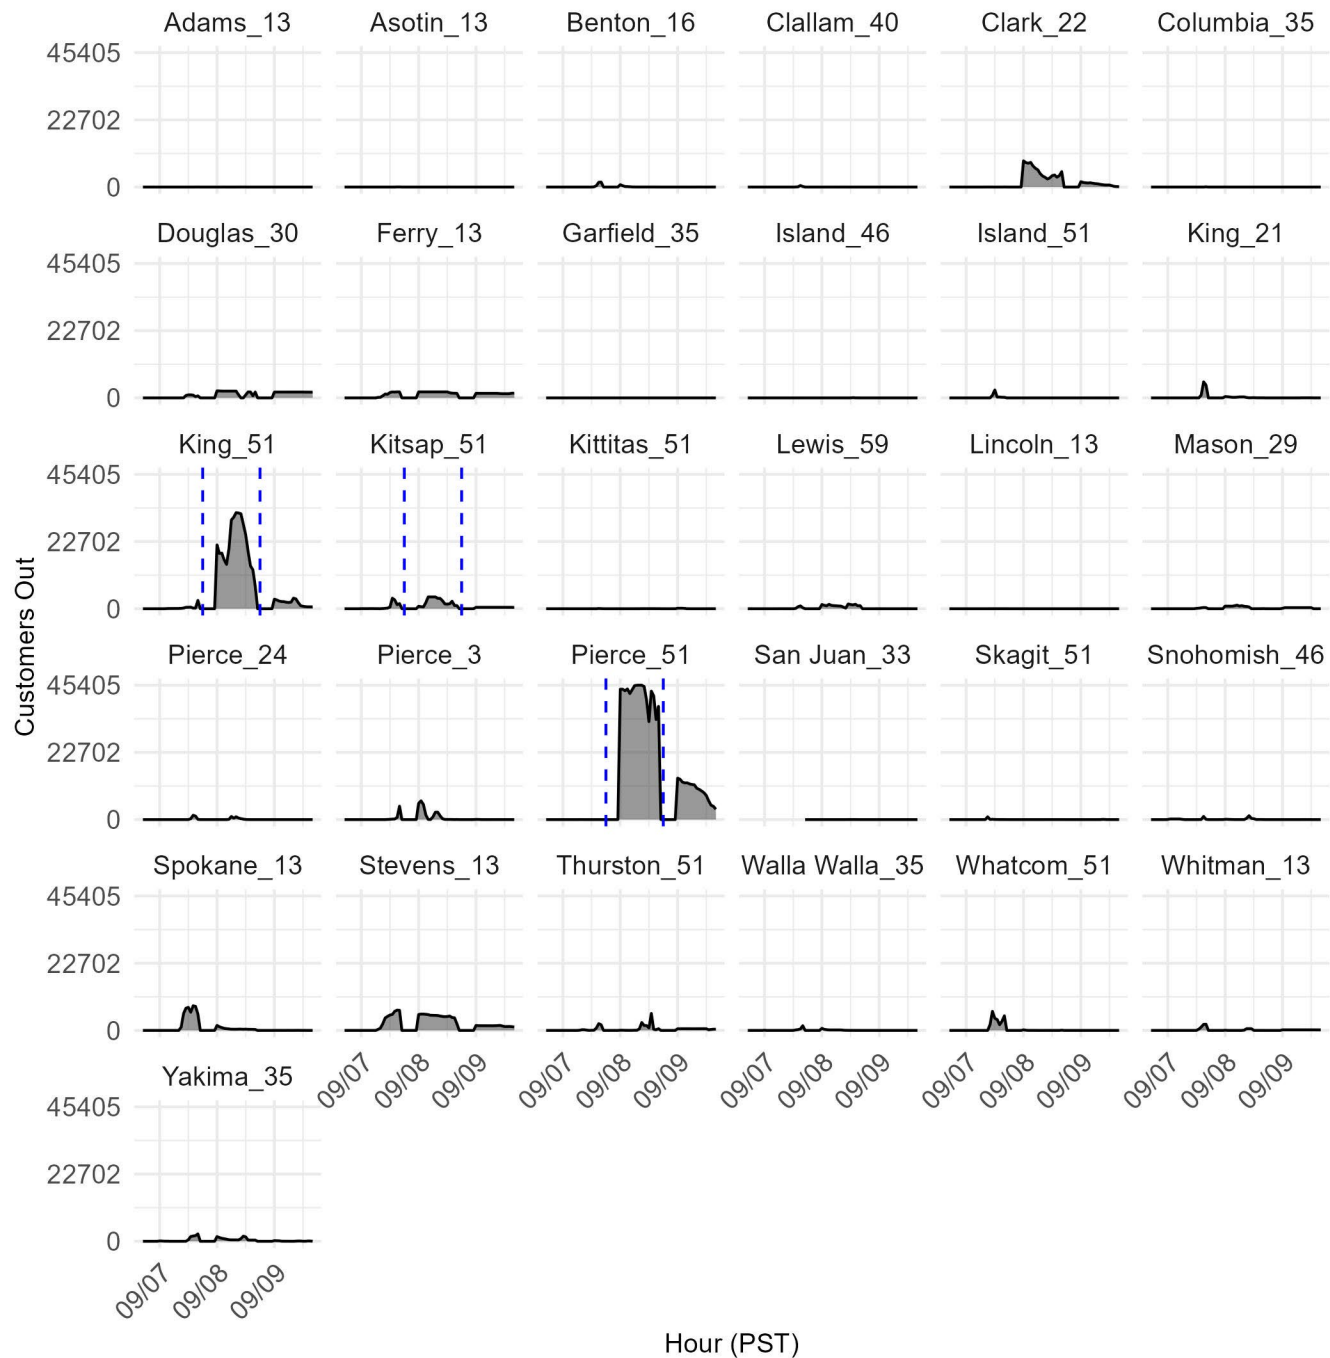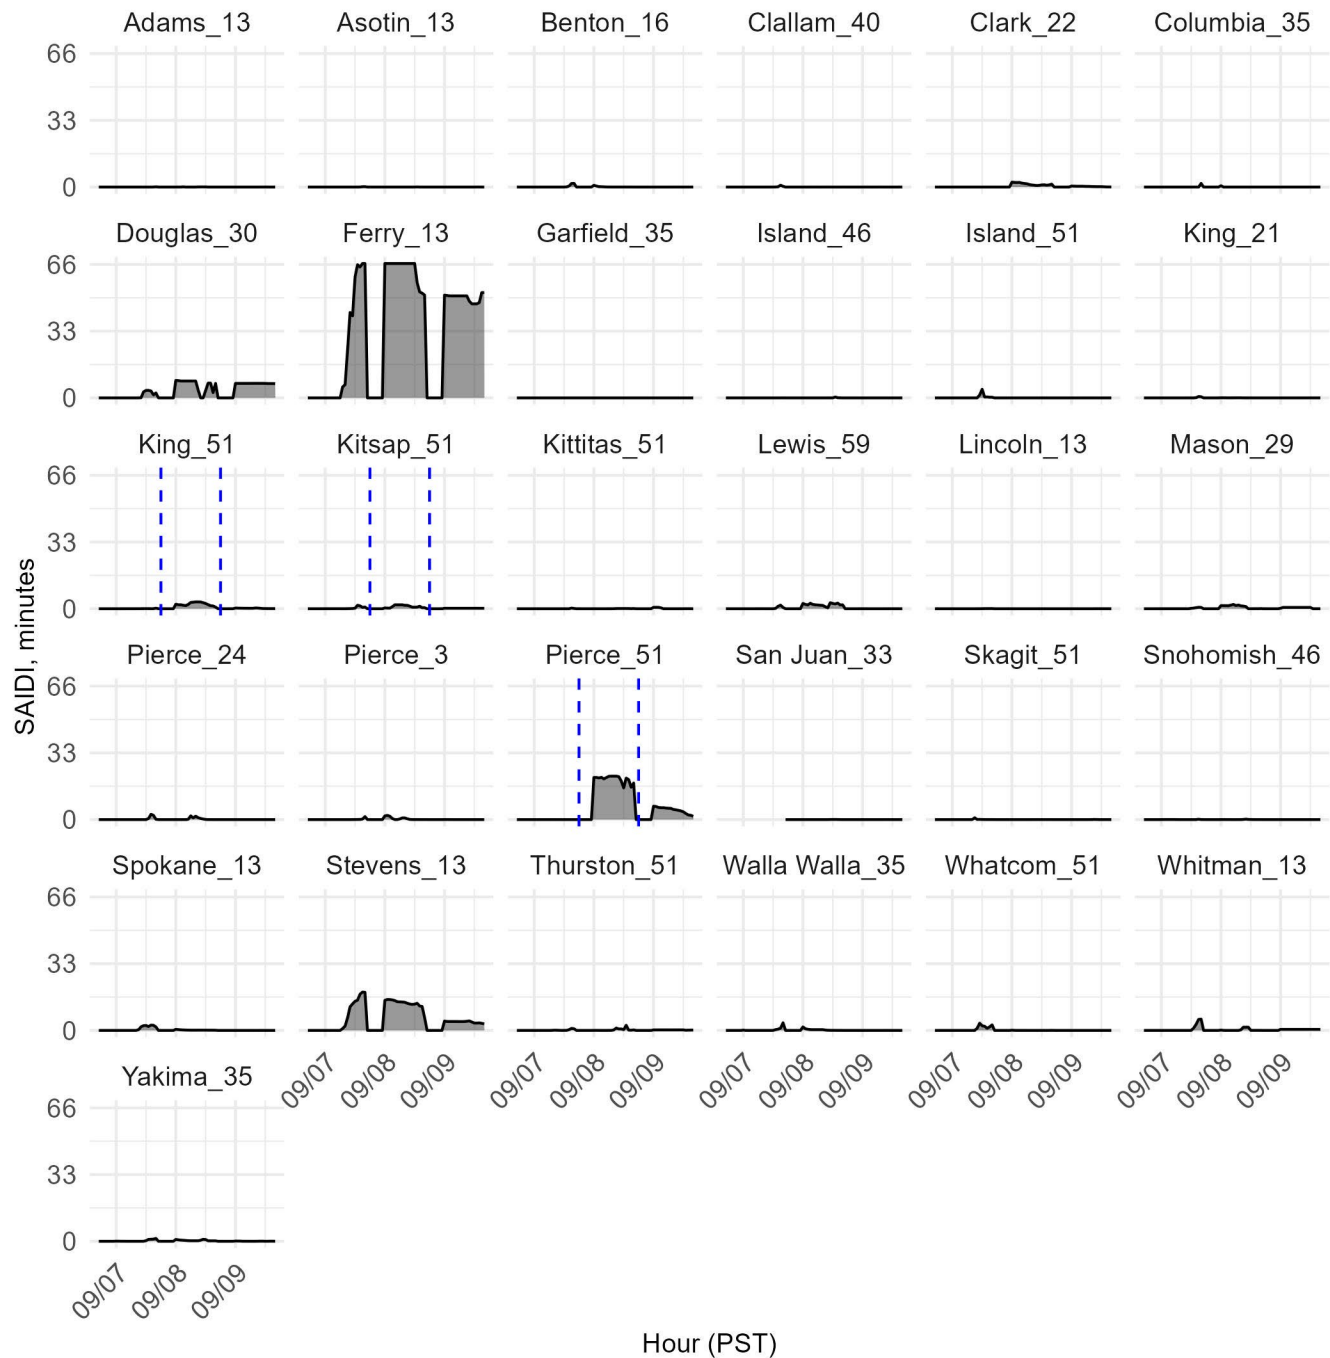

# Fig S2, Event 6: 2020

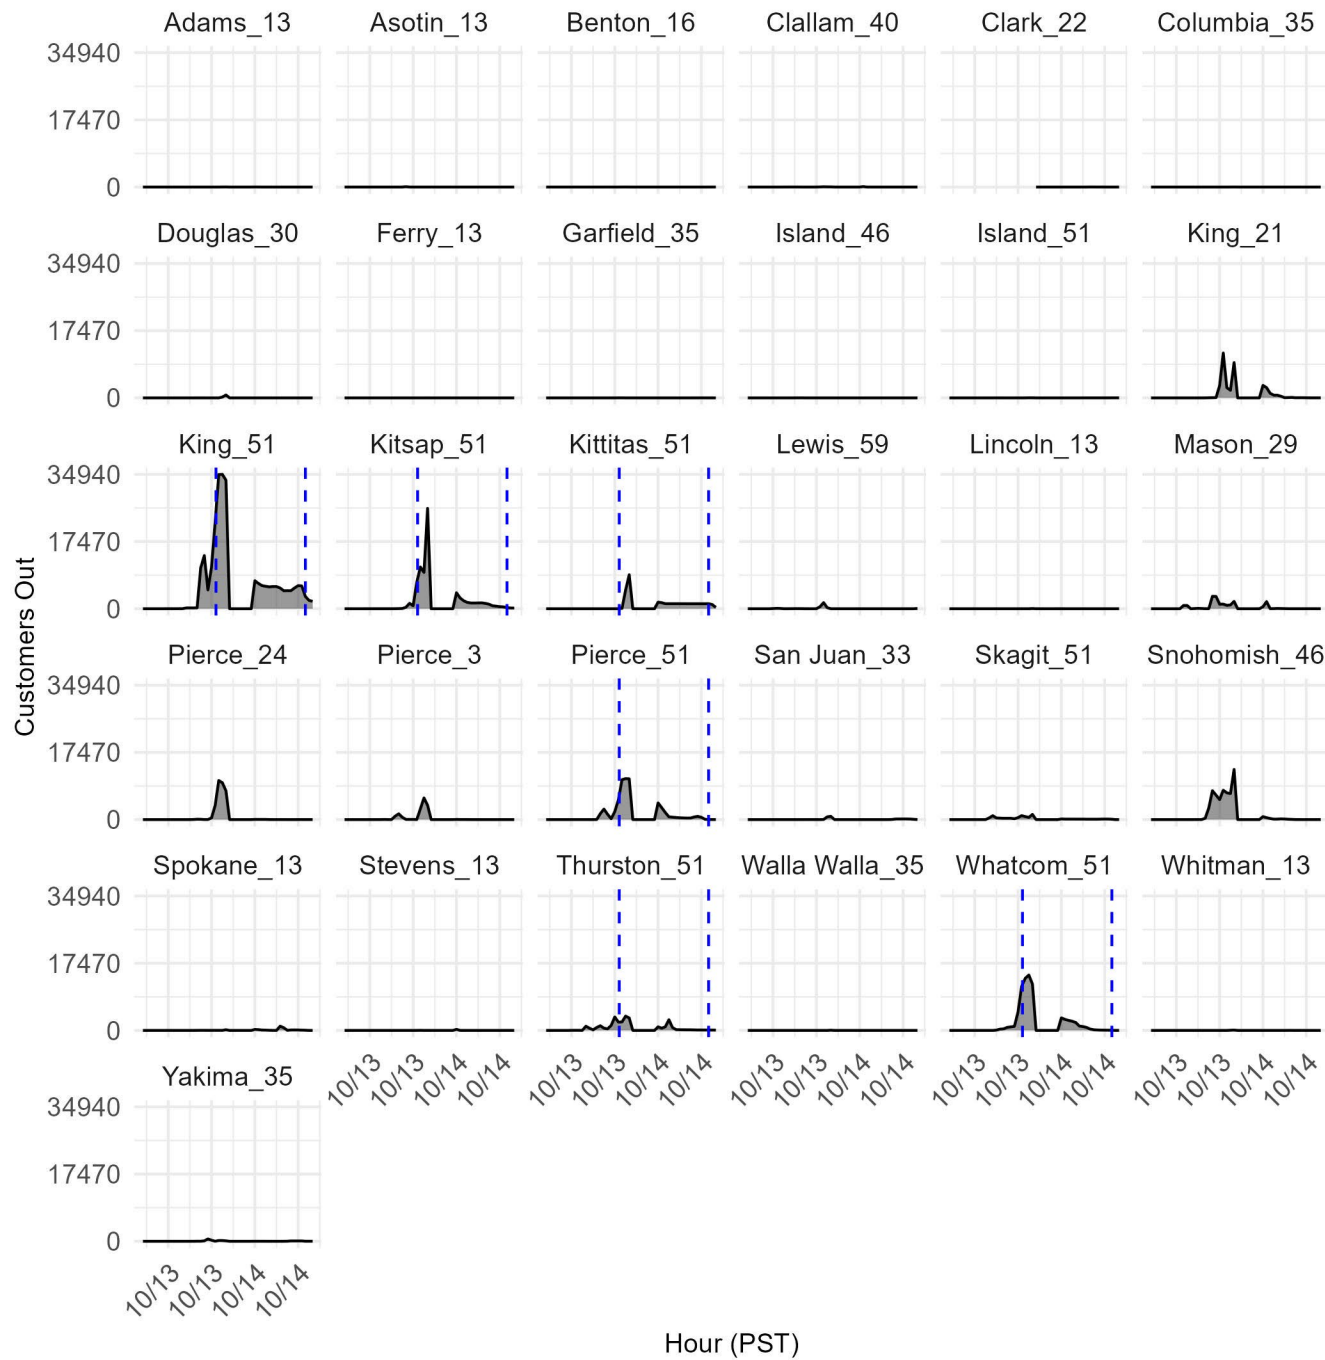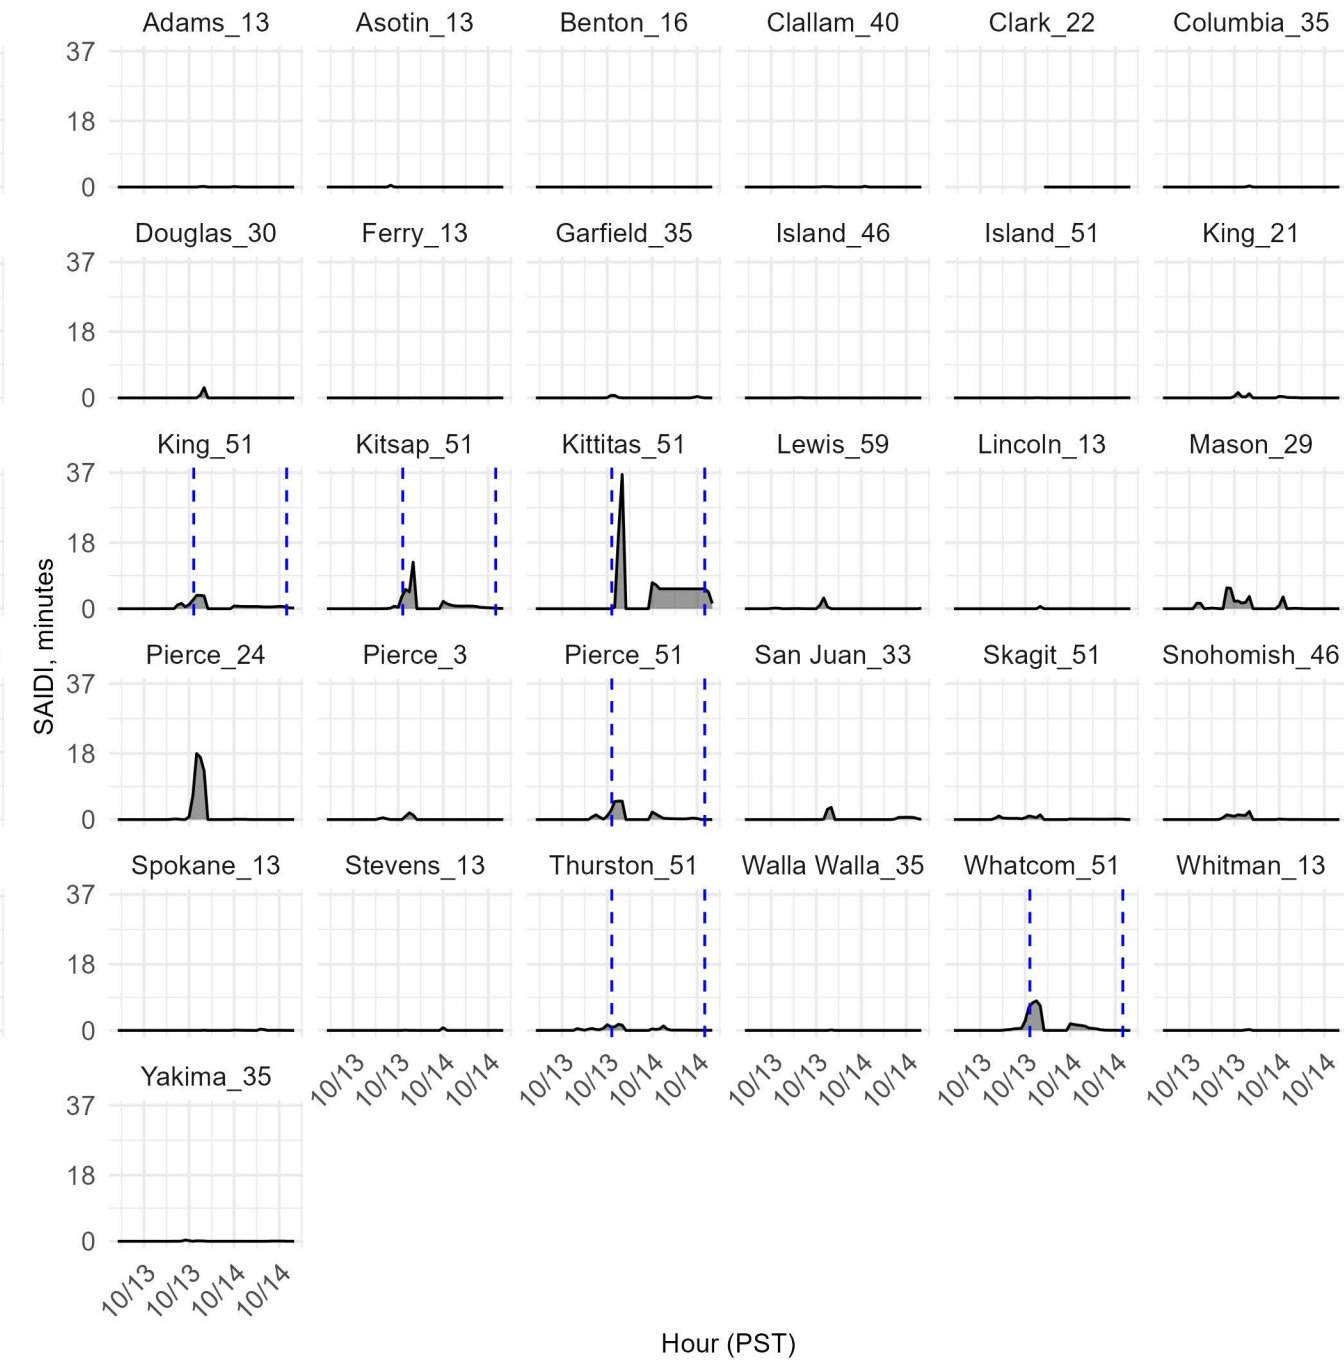

# Fig S2, Event 7: 2021

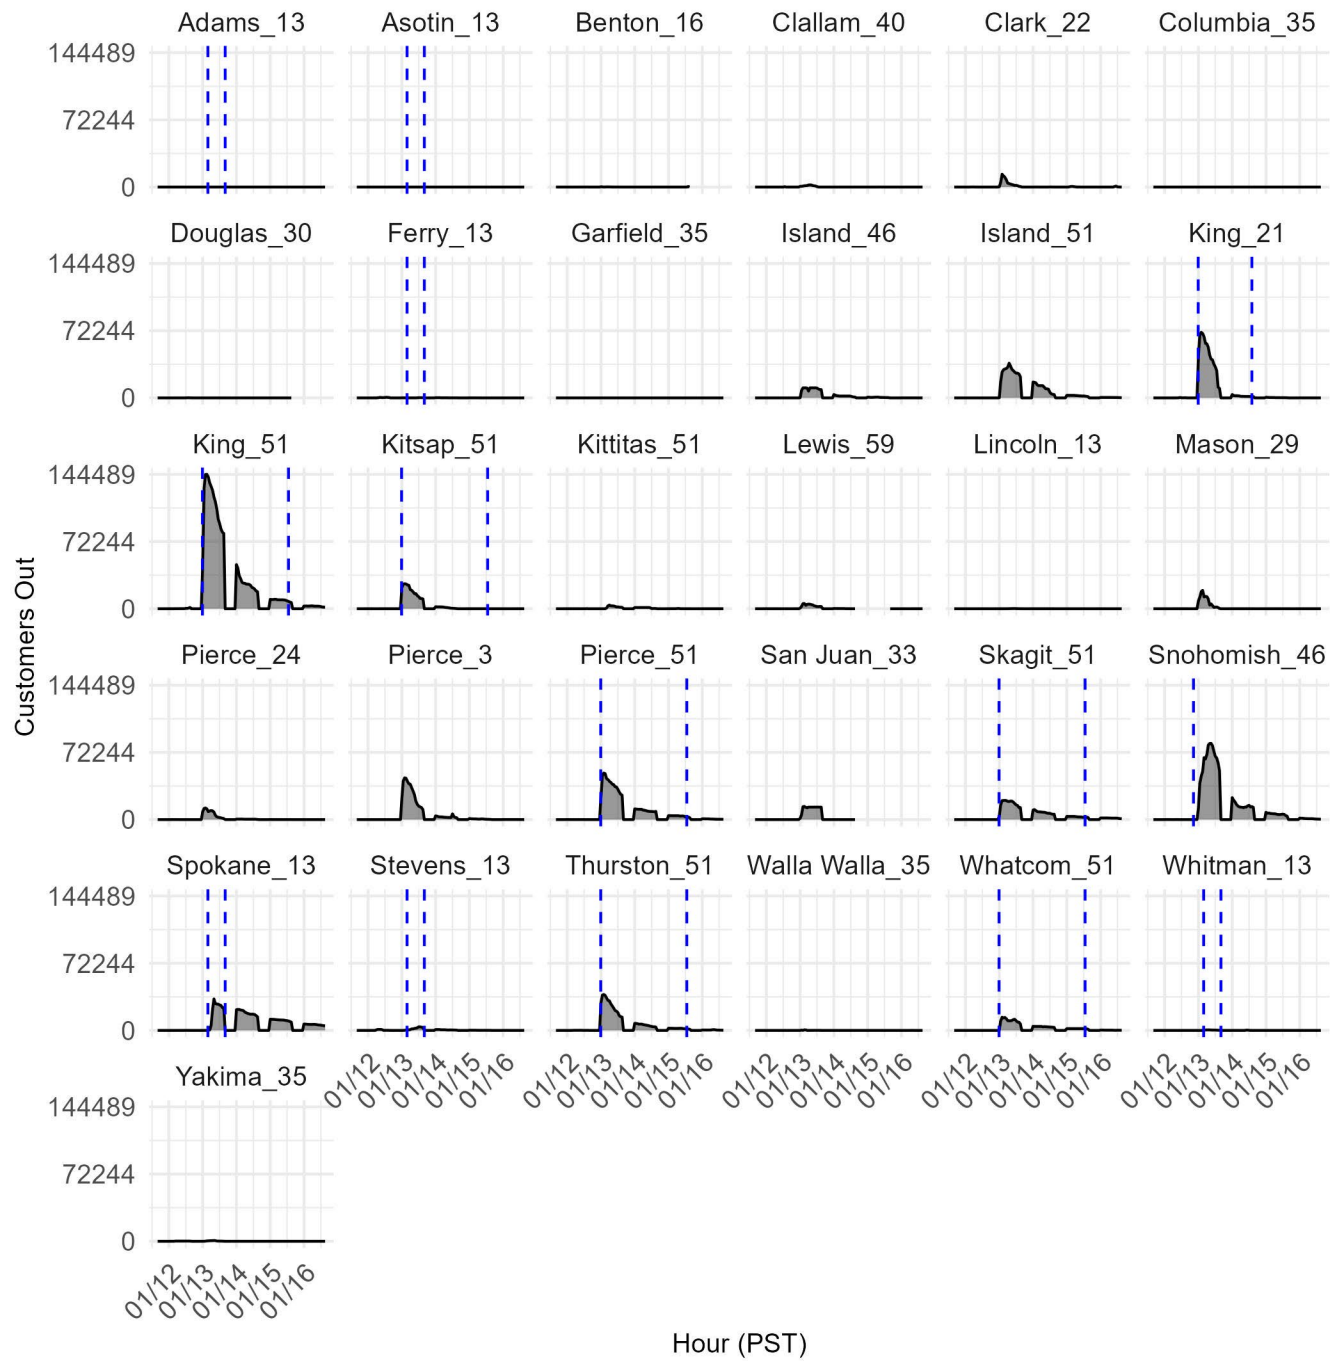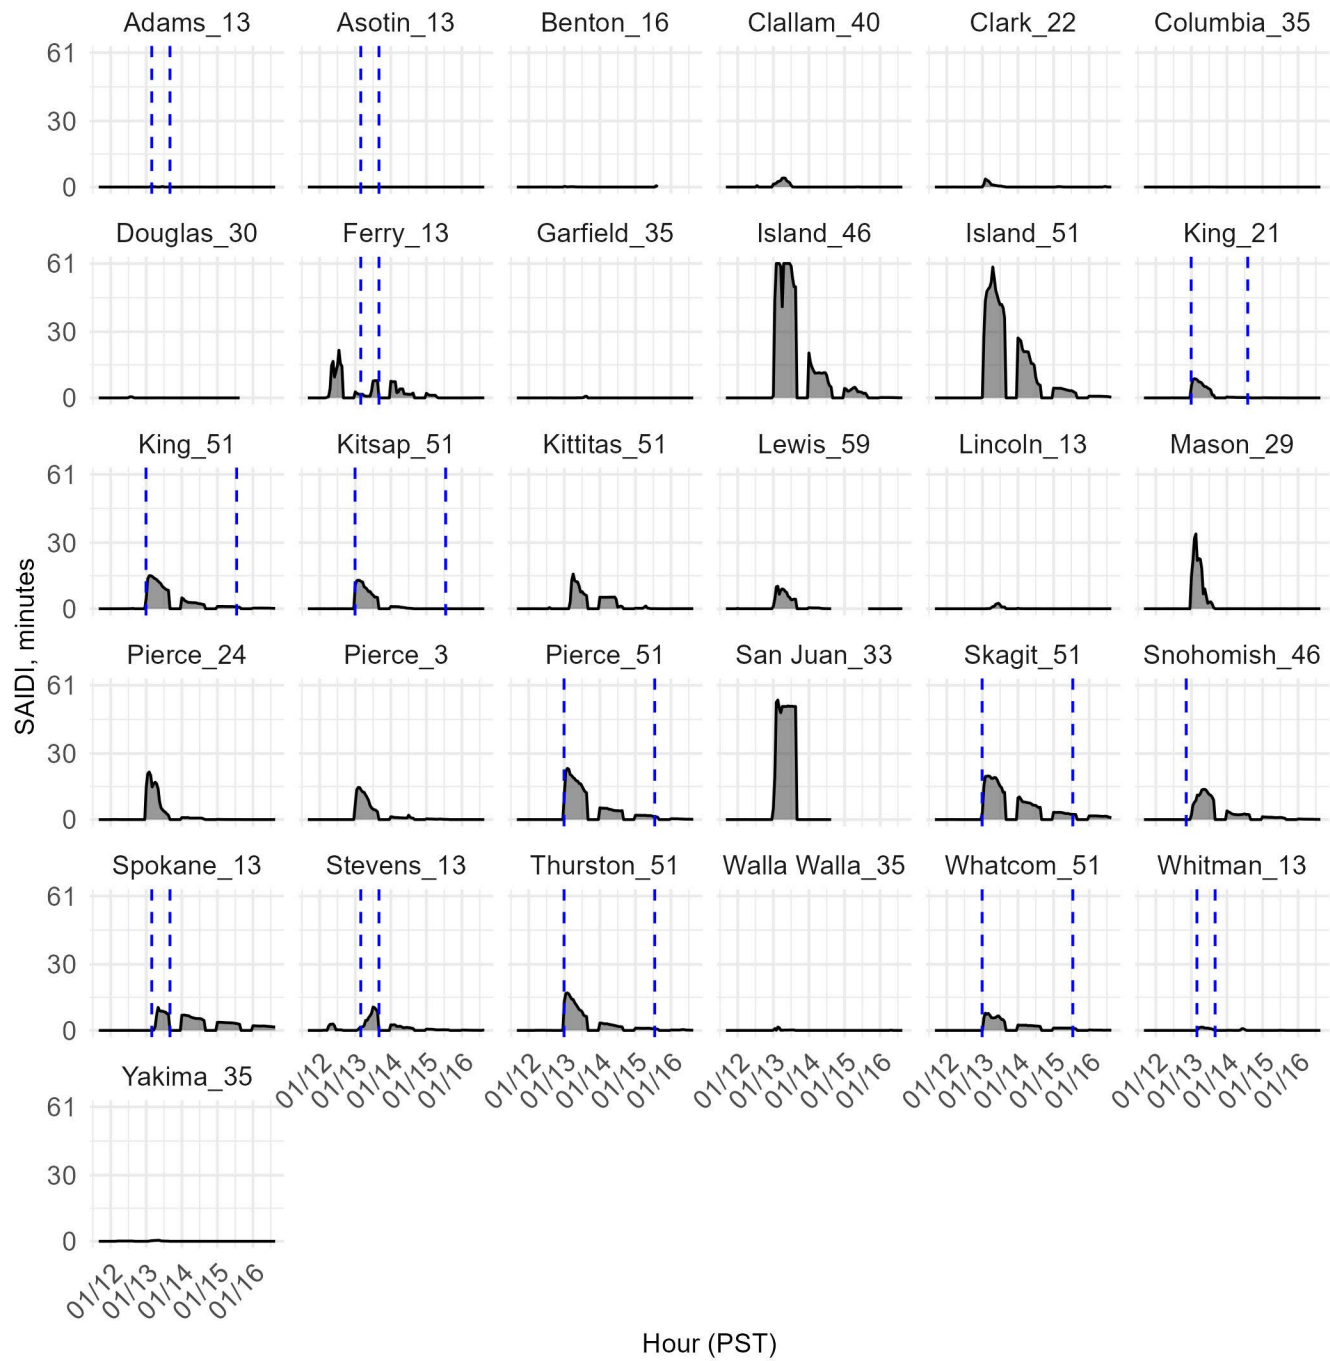

# Fig S2, Event 8: 2021

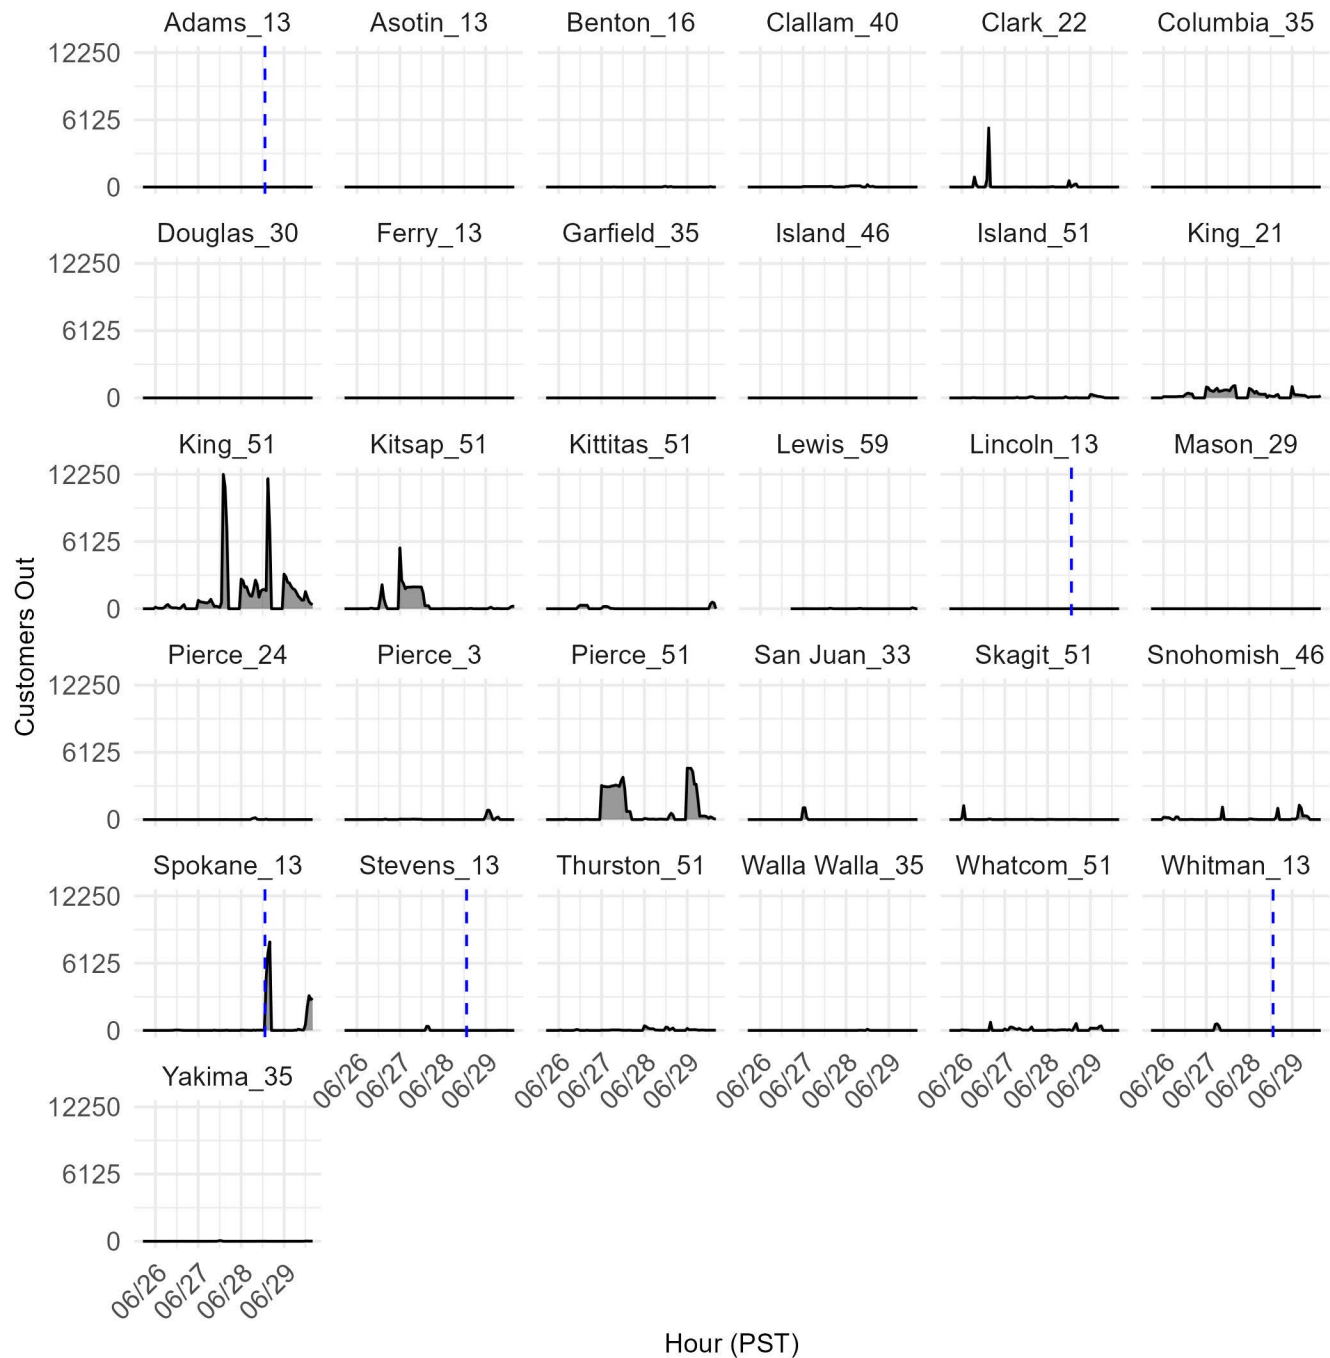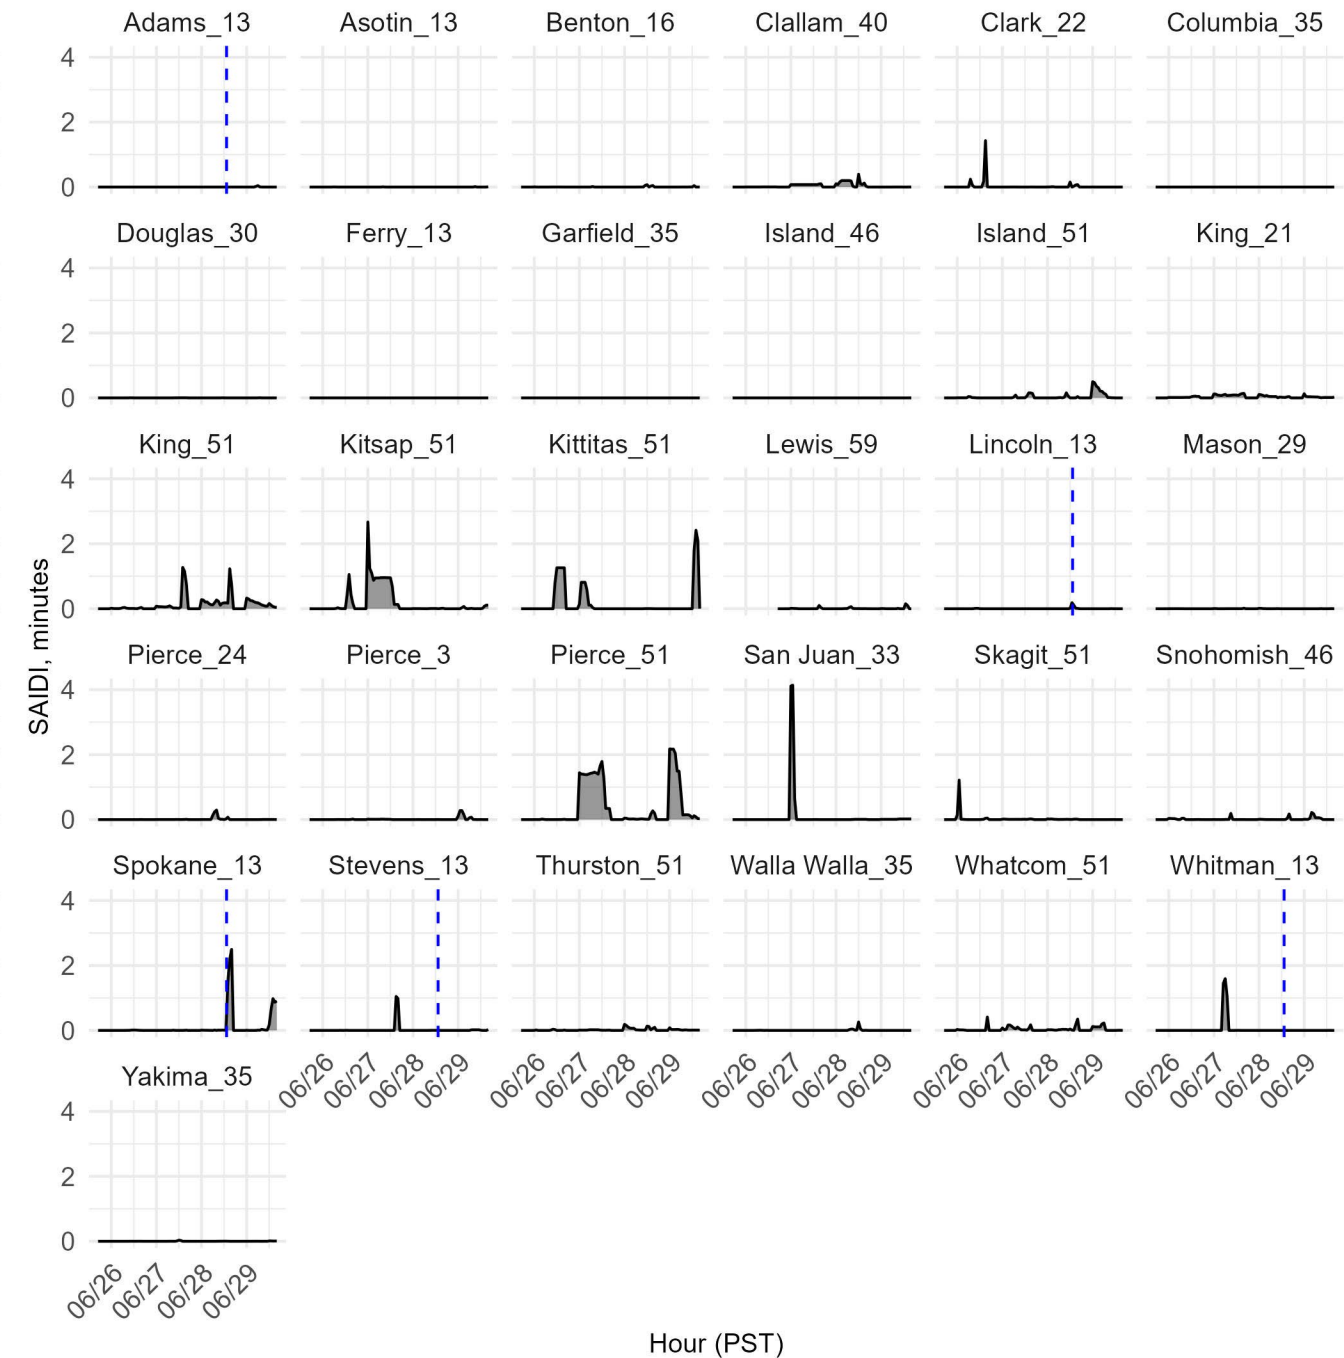



# Fig S2, Event 9: 2021

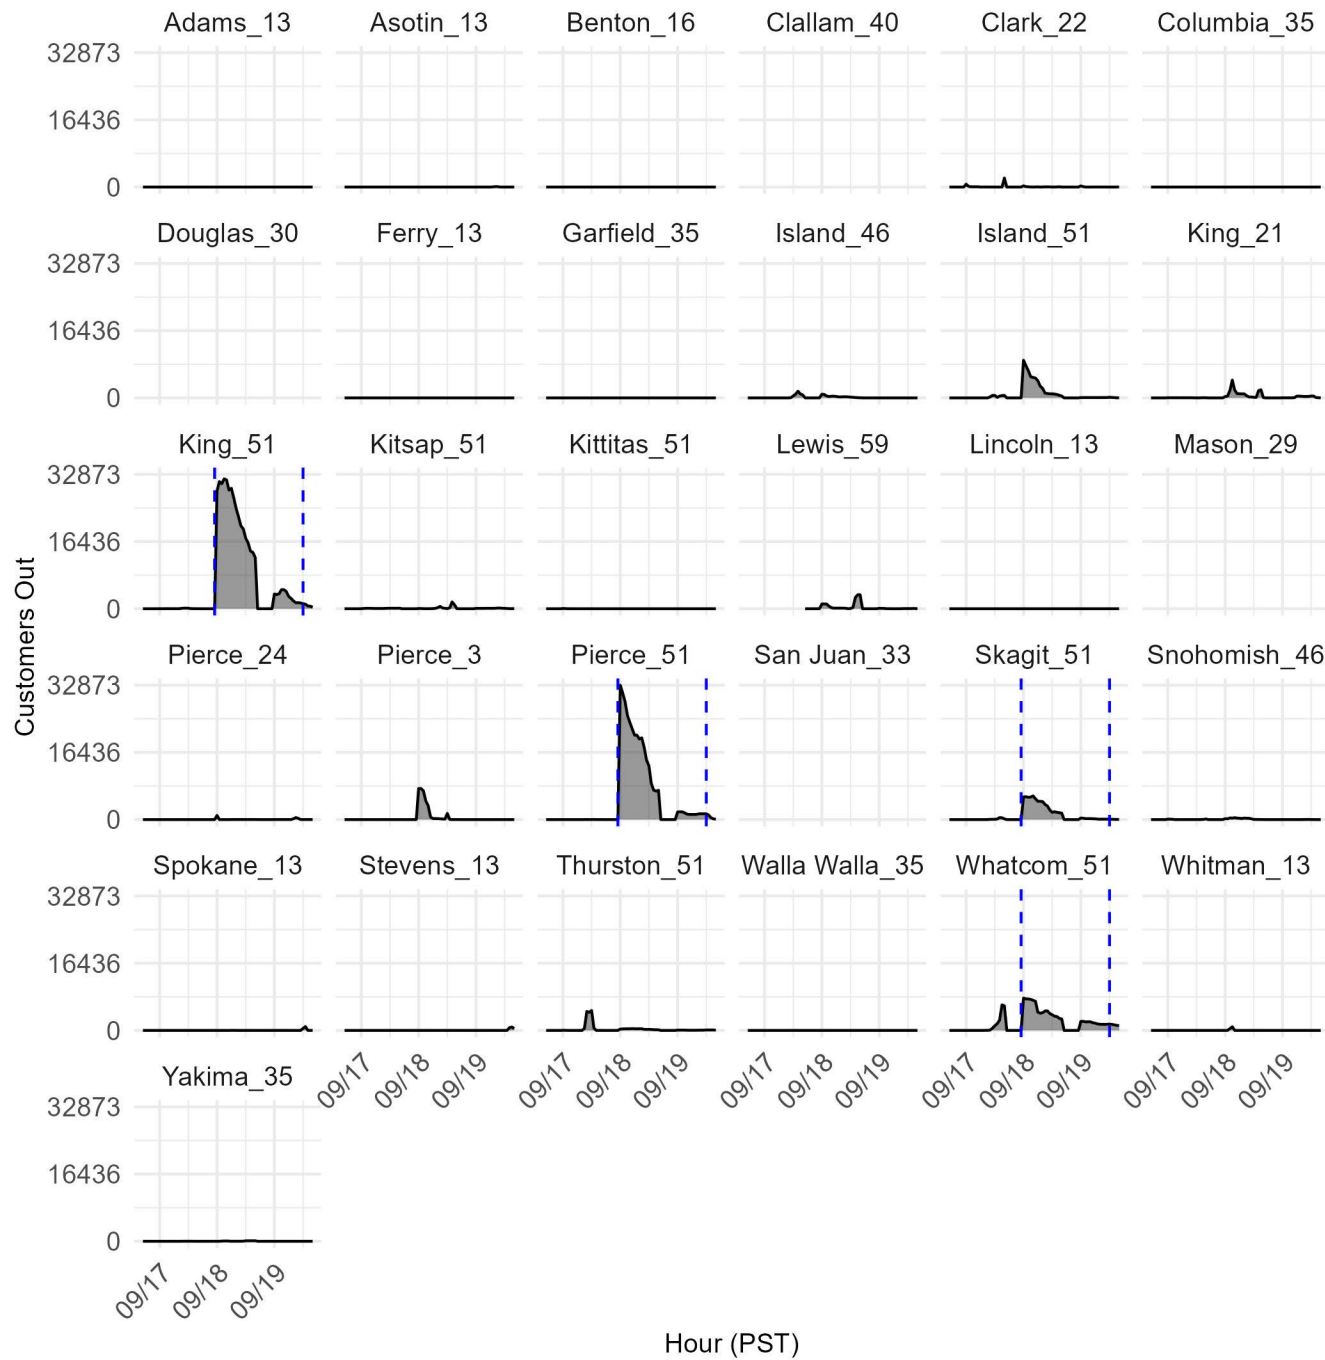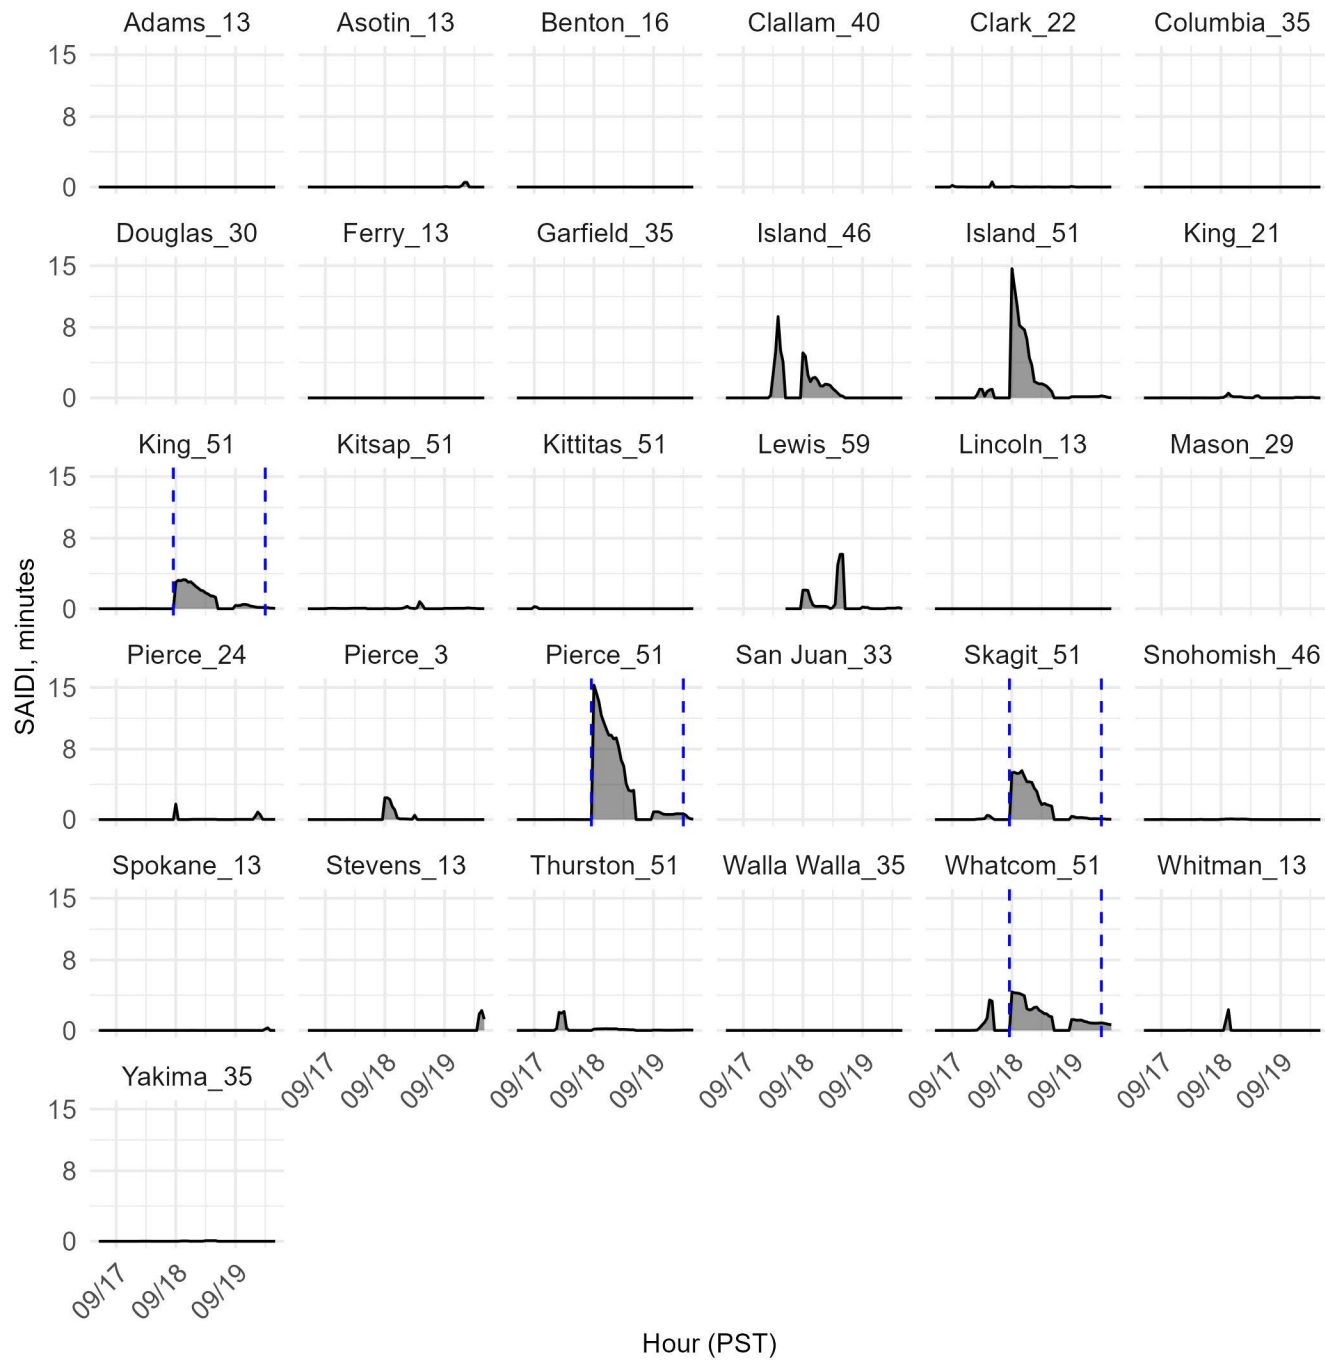

# Fig S2, Event 10: 2021

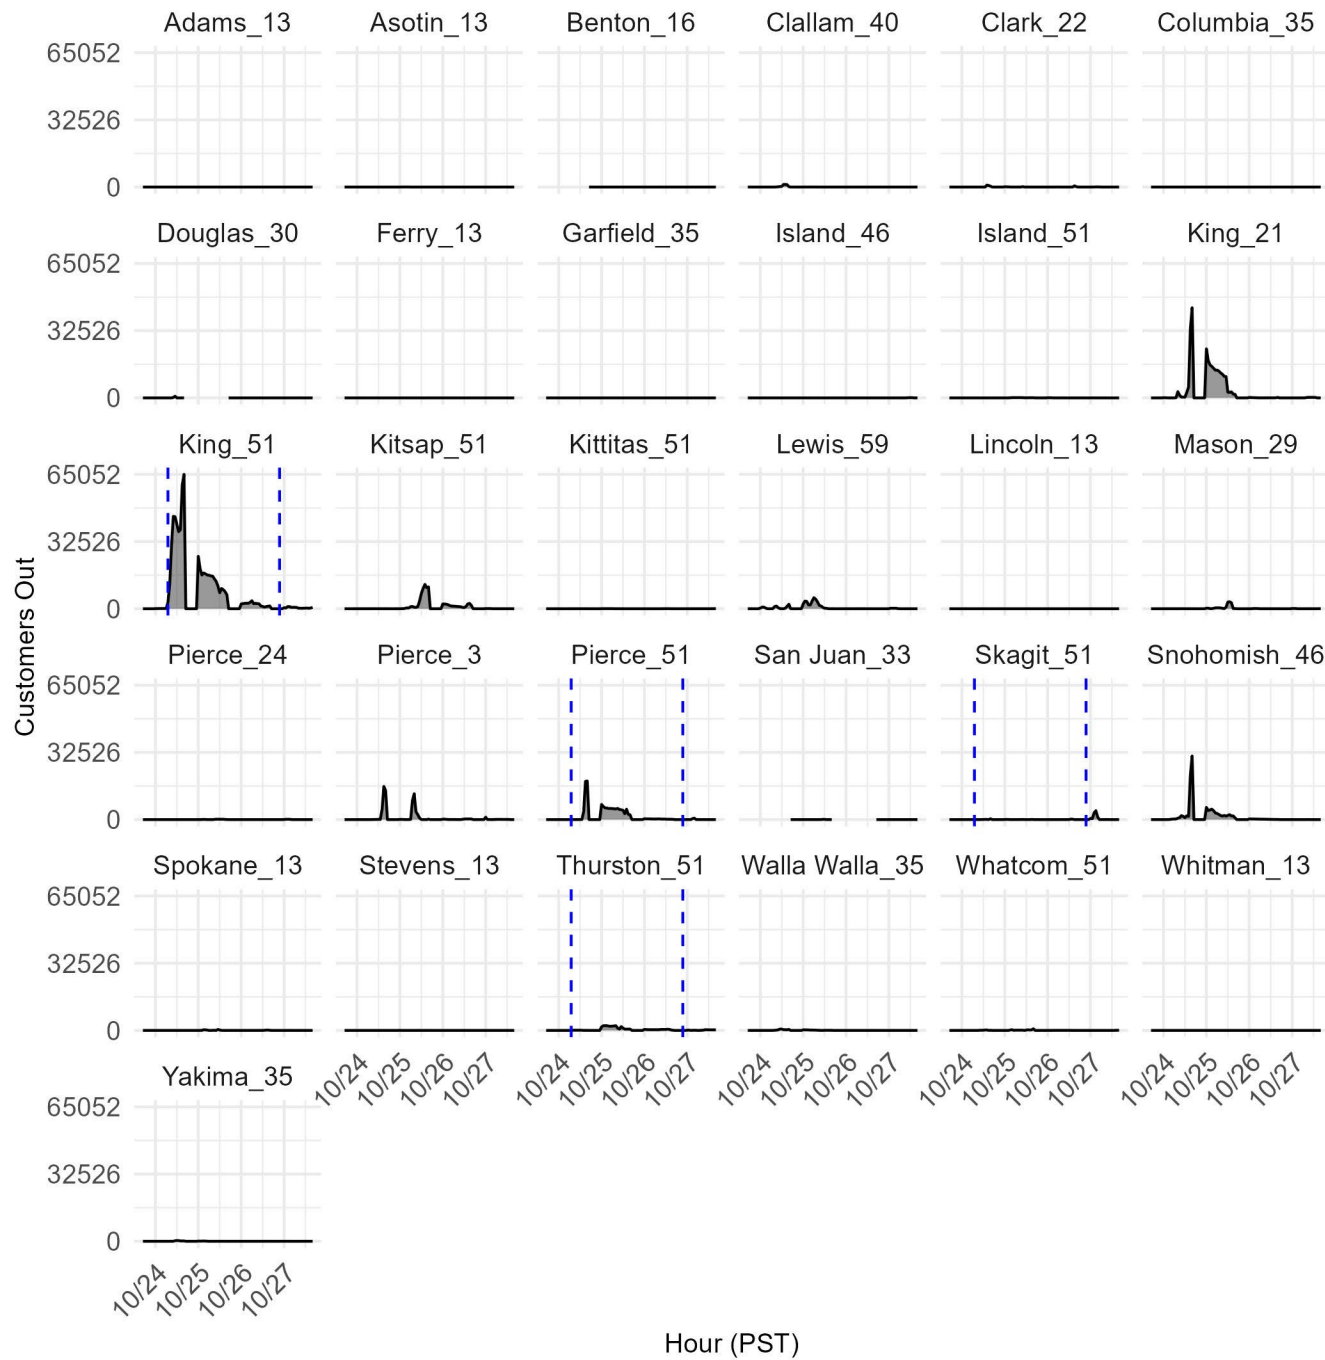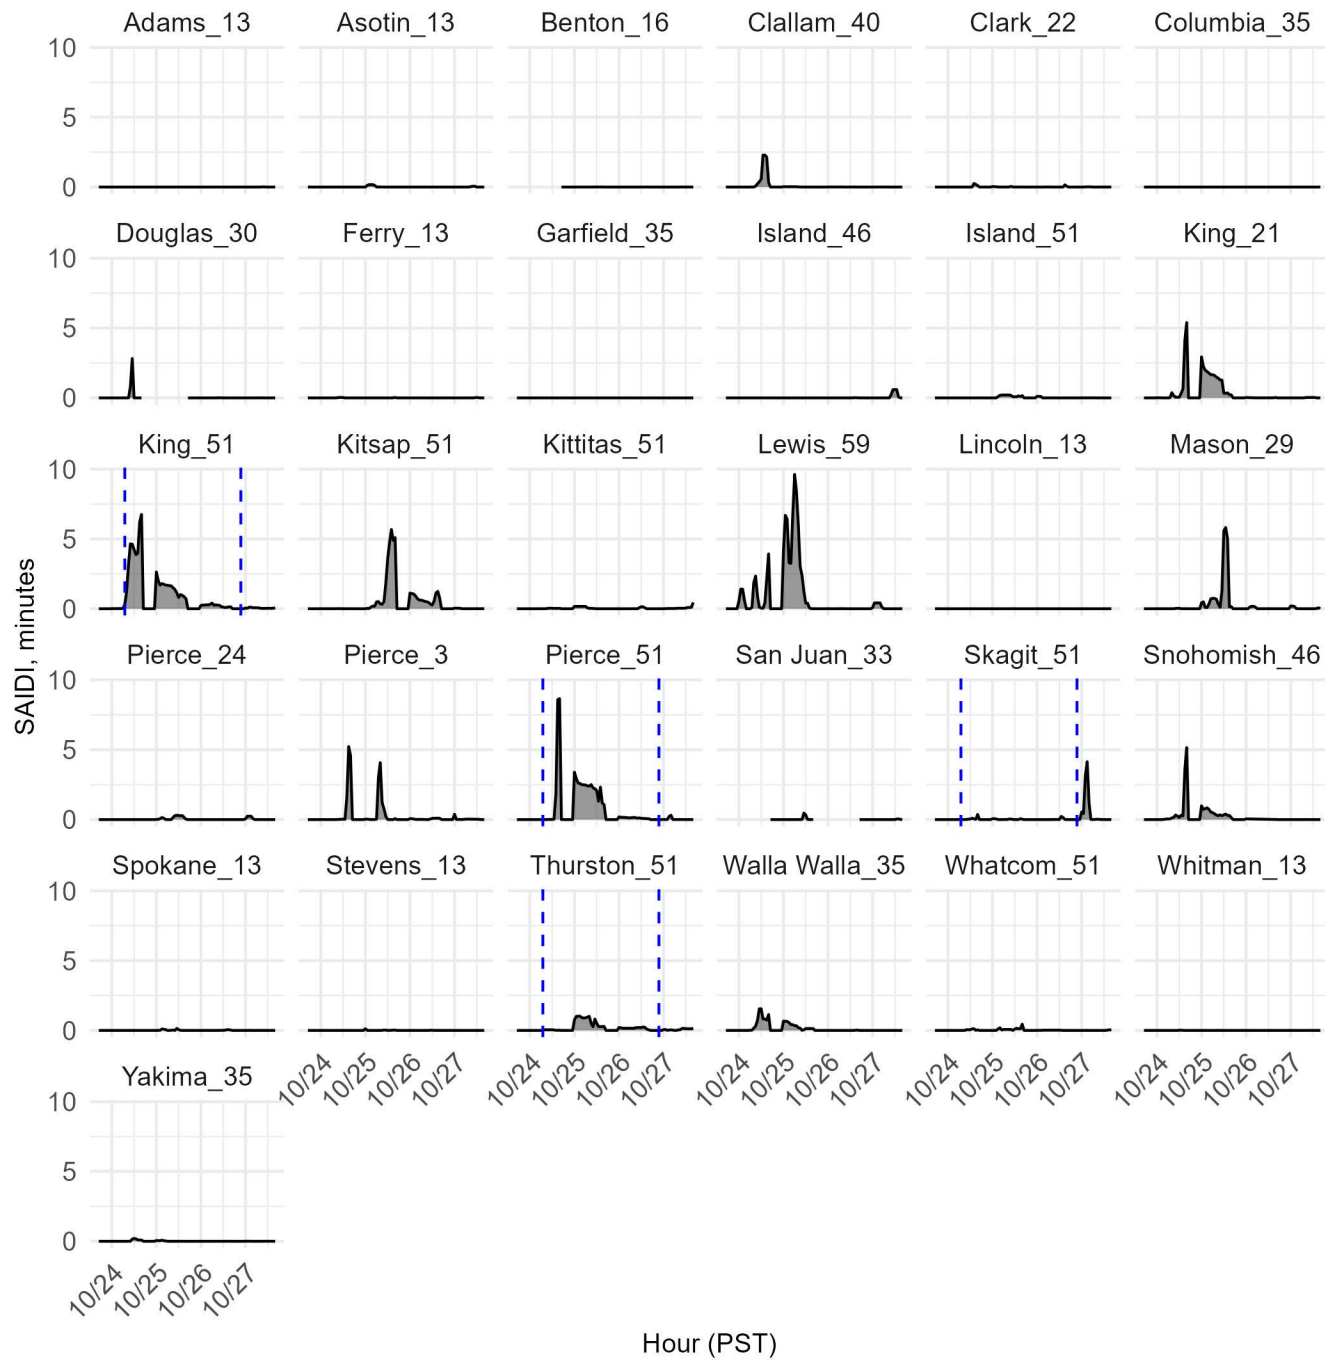

# Fig S2, Event 11: 2021

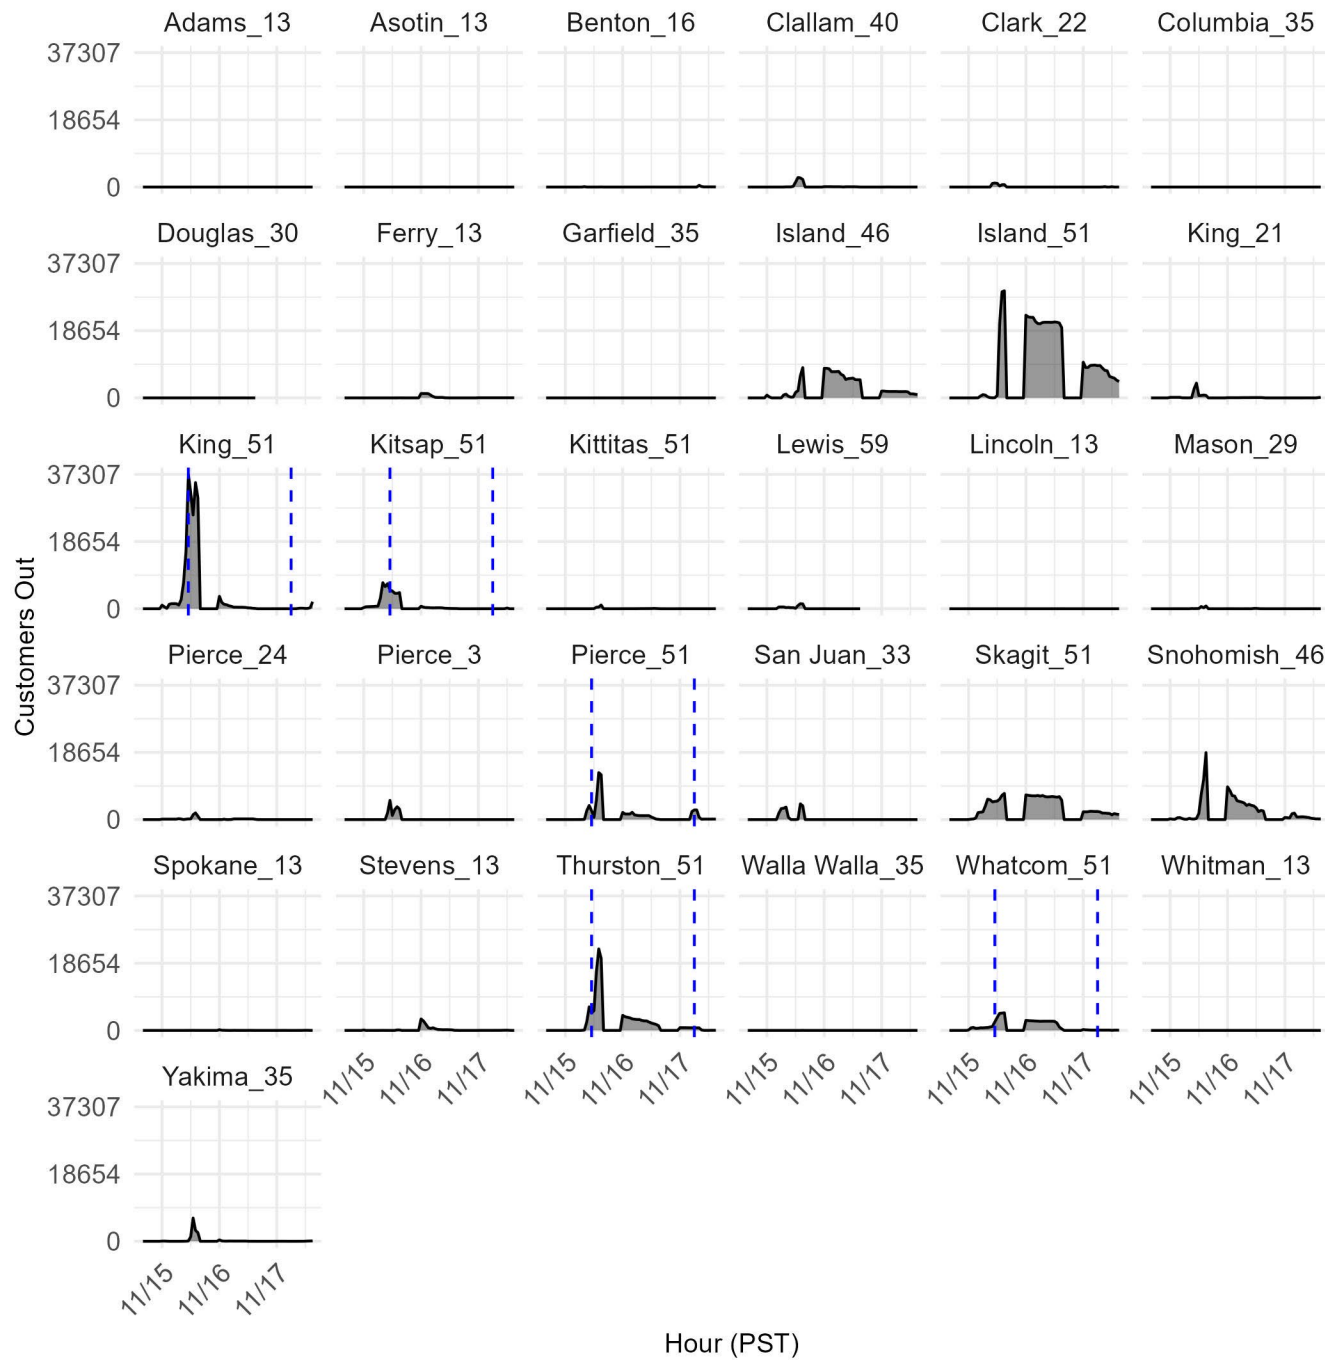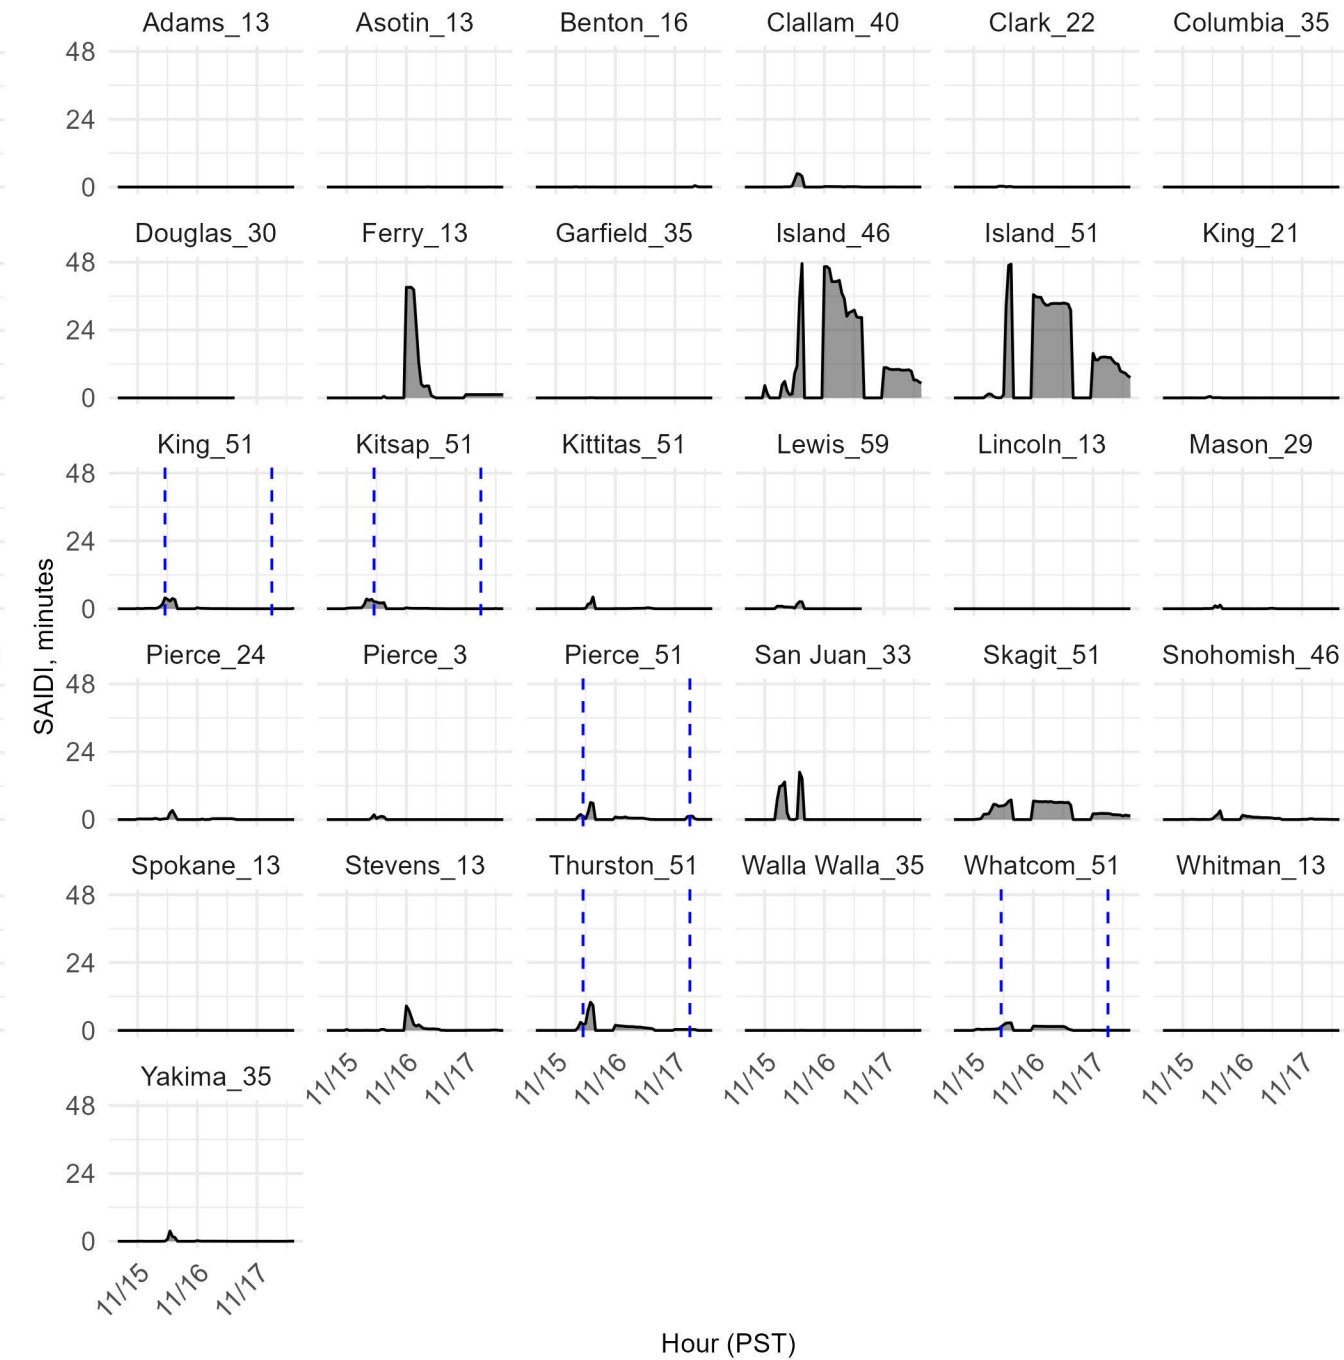

Supplement: pone.0307742.s002.pdf [file pone.0307742.s002.pdf]
